# Supplementary material for: Organocatalysis by an aprotic imidazolium zwitterion: a dramatic anion–cation cooperative effect on azide–nitrile cycloaddition
Source: Royal Society of Chemistry journal article supplement (doi:10.1039/c3ra46293e), 2013-12-20
Supplement: c3ra46293e.pdf [file c3ra46293e.pdf]

# Organocatalysis by aprotic imidazolium zwitterion: A dramatic anion–cation cooperative effect on azide-nitrile cycloaddition

Matiur Rahman, Anupam Roy, Monoranjan Ghosh, Shubhanjan Mitra, Adinath Majee\* and Alakananda

Hajra\*

Department of Chemistry, Visva-Bharati University, Santiniketan 731235, India

Email: [alakananda.hajra@visva-bharati.ac.in](mailto:alakananda.hajra@visva-bharati.ac.in)

## Table of Contents

|                                                                        |   |
|------------------------------------------------------------------------|---|
| General experimental methods .....                                     | 2 |
| Experimental procedure for synthesis of compound .....                 | 2 |
| Characterization data of compound .....                                | 3 |
| References .....                                                       | 7 |
| <sup>1</sup> H and <sup>13</sup> C NMR spectra for all compounds ..... | 8 |

**General:** Melting points were determined on a glass disk with an electrical bath and are uncorrected.  $^1\text{H}$  NMR spectra were determined on a Bruker 400 (400 MHz) spectrometer as solutions in  $\text{DMSO-}d_6$ . Chemical shifts are expressed in parts per million ( $\delta$ ) and are referenced to tetramethylsilane (TMS) as internal standard and the signals were reported as s (singlet), d (doublet), t (triplet), m (multiplet) and coupling constants  $J$  were given in Hz.  $^{13}\text{C}$  NMR spectra were recorded at 100 MHz in  $\text{CDCl}_3$  and  $\text{DMSO-}d_6$  solution. TLC was done on silica gel coated glass slide (Merck, Silica gel G for TLC). IR spectra were taken as KBr plates. Commercially available substrates were freshly distilled before the reaction. Solvents, reagents and chemicals were purchased from Aldrich, Fluka, Merck, SRL, Spectrochem and Process Chemicals. All reactions involving moisture sensitive reactants were executed using oven dried glassware. Zwitterions were prepared using our reported method.<sup>1</sup>

**Typical procedure for the synthesis of 5-phenyl-1*H*-tetrazole:**

In a 50 mL round bottom flask benzonitrile nitrile (103 mg, 1 mmol), and  $\text{NaN}_3$  (98 mg, 1.5 mmol) were taken in presence of zwitterionic-salt (22 mg, 10 mol%) and the whole mixture was stirred at 120 °C (oil bath) for 12h. After completion of the reaction, the reaction mixture, being cooled to room temperature was treated with 4 M HCl (20 mL) and stirred vigorously. The solid product was filtered under suction and then recrystallized from hot ethanol to obtain the pure product. The identity and purity of the product was confirmed by  $^1\text{H}$  and  $^{13}\text{C}$  NMR spectroscopic analysis.

**Spectral and analytical data of all synthesized tetrazoles are presented in order of their entries (Table 2):**

**5-Phenyl-1H-tetrazole (3a):<sup>2</sup>**

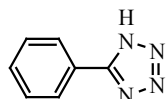

White solid, Yield: 123 mg, 84%; mp. 211-212 °C,

IR (KBr): 3207, 3000, 1611, 1562, 1493, 1466, 688 cm<sup>-1</sup>; <sup>1</sup>H NMR (400 MHz, DMSO-*d*<sub>6</sub>): δ 8.07-8.02 (m, 2H), 7.64-7.58 (m, 3H); <sup>13</sup>C NMR (100 MHz, DMSO-*d*<sub>6</sub>): δ 155.2, 131.2, 129.4, 126.9, 124.1.

**5-*p*-Tolyl-1H-tetrazole (3b):<sup>3</sup>**

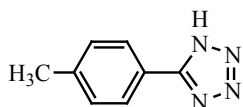

White solid, Yield: 131 mg, 82%; mp. 251-252 °C;

IR (KBr): 3440, 1595, 1562, 1485, 1412 cm<sup>-1</sup>; <sup>1</sup>H NMR (400 MHz, DMSO-*d*<sub>6</sub>): δ 7.92 (d, *J* = 8.0 Hz, 2H), 7.41 (d, *J* = 8.0 Hz, 2H), 2.38 (s, 3H); <sup>13</sup>C NMR (100 MHz, DMSO-*d*<sub>6</sub>): δ 155.3, 141.2, 129.9, 126.9, 121.2, 21.0.

**5-*m*-Tolyl-1H-tetrazole (3c):<sup>5</sup>**

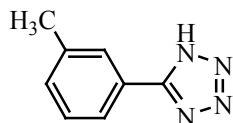

Off white solid, Yield: 130 mg, 81%; mp. 143-144 °C;

IR (KBr): 3442, 1598, 1563, 1484, 1411 cm<sup>-1</sup>;

$^1\text{H}$  NMR (400 MHz,  $\text{DMSO-}d_6$ ):  $\delta$  7.86 (s, 1H), 7.82 (d,  $J = 7.6$  Hz, 1H), 7.48 (t,  $J = 7.6$  Hz, 1H), 7.39 (d,  $J = 7.6$  Hz, 1H), 2.39 (s, 3H);  $^{13}\text{C}$  NMR (100 MHz,  $\text{DMSO-}d_6$ ):  $\delta$  155.2, 138.8, 131.9, 129.3, 127.4, 124.1, 124.0, 20.9.

### 5-(4-Methoxyphenyl)-1H-tetrazole (3d):<sup>2</sup>

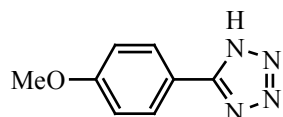

White solid, Yield: 134 mg, 76%; mp. 231-233 °C.

IR (KBr): 3200, 1298, 1184, 1035, 750  $\text{cm}^{-1}$ ;  $^1\text{H}$  NMR (400 MHz,  $\text{DMSO-}d_6$ ):  $\delta$  7.98 (dd,  $J_1 = 6.8$  Hz,  $J_2 = 2.0$  Hz), 7.16 (d,  $J = 8.8$  Hz, 2H), 3.84 (s, 3H);  $^{13}\text{C}$  NMR (100 MHz,  $\text{DMSO-}d_6$ ):  $\delta$  161.5, 154.7, 128.6, 116.3, 114.8, 55.4.

### 5-(3-Methoxyphenyl)-1H-tetrazole (3e):<sup>6</sup>

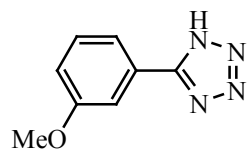

White solid, Yield: 132 mg, 75%, mp. 156-158 °C;

IR (KBr): 3199, 3161, 3043, 2985, 1325, 1280, 1153, 1041, 858, 742  $\text{cm}^{-1}$ ;  $^1\text{H}$  NMR (400 MHz,  $\text{DMSO-}d_6$ ):  $\delta$  7.63-7.50 (m, 3H), 7.16 (d,  $J = 8.0$  Hz, 1H), 3.85 (s, 3H);  $^{13}\text{C}$  NMR (100 MHz,  $\text{DMSO-}d_6$ ):  $\delta$  159.7, 155.2, 130.6, 125.3, 119.2, 117.0, 112.1, 55.4.

### 5-(4-Chlorophenyl)-1*H*-tetrazole (3f):<sup>3</sup>

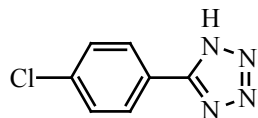

White solid, Yield: 130 mg, 72%; mp. 261-263 °C;

IR (KBr): 3419, 2927, 1602, 1457, 1383, 1055, 765  $\text{cm}^{-1}$ ;  $^1\text{H}$  NMR (400 MHz,  $\text{DMSO-}d_6$ ):  $\delta$  7.88 (d,  $J = 8.0$  Hz, 2H), 7.66 (d,  $J = 8.0$  Hz, 2H);  $^{13}\text{C}$  NMR (100 MHz,  $\text{DMSO-}d_6$ ):  $\delta$  150.1, 138.5, 134.1, 129.7, 129.4, 128.3.

### 5-(3-Chlorophenyl)-1*H*-tetrazole (3g):<sup>3</sup>

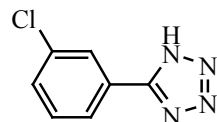

White solid, Yield: 131 mg, 73%; mp. 137-138 °C;

IR (KBr): 3407, 2915, 2796, 2720, 1599, 1459, 1439, 1390, 1158, 1089, 1055, 870, 766  $\text{cm}^{-1}$ ;  $^1\text{H}$  NMR (400 MHz,  $\text{DMSO-}d_6$ ):  $\delta$  8.08 (s, 1H), 8.03-8.00 (m, 1H), 7.68-7.65 (m, 2H);  $^{13}\text{C}$  NMR (100 MHz,  $\text{DMSO-}d_6$ ):  $\delta$  154.8, 134.0, 131.4, 131.0, 126.6, 126.3, 125.6.

### 5-(2-Chlorophenyl)-1*H*-tetrazole (3h):<sup>3</sup>

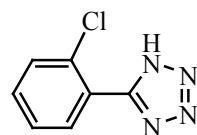

White solid, Yield: 130 mg, 72%; mp. 179-181 °C

IR (KBr): 3402, 2930, 1689, 1450, 1160, 1050, 760  $\text{cm}^{-1}$ ;  $^1\text{H}$  NMR (400 MHz,  $\text{DMSO-}d_6$ ):  $\delta$  7.81 (dd,  $J_1 = 7.6$  Hz,  $J_2 = 1.6$  Hz, 1H), 7.72 (dd,  $J_1 = 8.0$ ,  $J_2 = 1.2$  Hz, 1H), 7.64 (dt,  $J_1 = 8.0$  Hz,

$J_2 = 1.6$  Hz, 1H), 7.57 (dt,  $J_1 = 7.6$  Hz,  $J_2 = 1.2$  Hz, 1H);  $^{13}\text{C}$  NMR (100 MHz, DMSO- $d_6$ ):  $\delta$  152.3, 131.6, 131.0, 130.7, 129.4, 126.8, 123.1.

#### 5-(3-Bromophenyl)-1H-tetrazole (3i):<sup>4</sup>

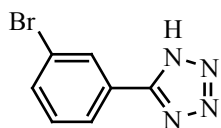

White solid, Yield: 168 mg, 75%; mp. 146-147 °C;

IR (KBr): 3424, 3066, 1714, 1604, 1557, 1092, 797  $\text{cm}^{-1}$ ;  $^1\text{H}$  NMR (400 MHz, DMSO- $d_6$ ):  $\delta$  16.67 (br, 1H), 8.22-8.21 (m, 1H), 8.06 (d,  $J = 7.8$  Hz, 1H), 7.82-7.79 (m, 1H), 7.58 (t,  $J = 7.92$  Hz, 1H);  $^{13}\text{C}$  NMR (100 MHz, DMSO- $d_6$ ):  $\delta$  155.1, 134.3, 132.0, 129.8, 127.0, 126.4, 122.8.

#### 5-(Thiophen-2-yl)-1H-tetrazole (3j):

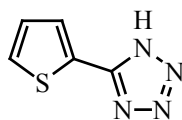

White solid, Yield: 123 mg, 81%; mp. 195 °C;

IR (KBr): 3076, 2950, 1759, 1593, 1505, 961, 718  $\text{cm}^{-1}$ ;  $^1\text{H}$  NMR (400 MHz, DMSO- $d_6$ ):  $\delta$  16.88 (br, 1H), 7.90-7.89 (d,  $J = 5.04$  Hz, 1H), 7.81-7.80 (d,  $J = 3.64$  Hz, 1H), 7.29 (t,  $J = 4.04$  Hz, 1H);  $^{13}\text{C}$  NMR (100 MHz, DMSO- $d_6$ ):  $\delta$  151.7, 130.8, 129.6, 129.0, 125.8. Anal. Cald. for  $\text{C}_5\text{H}_4\text{N}_4\text{S}$ : C, 39.46; H, 2.65; N, 36.82%. Found: C, 39.41; H, 2.58; N, 36.76%.

## References:

1. (a) D. Kundu, R. K. Debnath, A. Majee and A. Hajra, *Tetrahedron Lett.*, 2009, **50**, 6998; (b) D. Kundu, A. Majee and A. Hajra, *Catal. Commun.*, 2010, **11**, 1157; (c) M. Rahman, A. K. Bagdi, D. Kundu, A. Majee and A. Hajra, *J. Heterocycl. Chem.* 2012, **49**, 1224.
2. Z. P. Demko and K. B. Sharpless, *J. Org. Chem.*, 2001, **66**, 7945.
3. L. Lang, B. Li, W. Liu, L. Jiang, Z. Xu and G. Yin, *Chem. Commun.*, 2010, **46**, 448.
4. A. Khalafi-Nezhad and S. Mohammadi, *RSC Adv.*, 2013, **3**, 4362.
5. P. B. Palde and T. F. Jamison, *Angew. Chem., Int. Ed.*, 2011, **50**, 3525.
6. D. Amantini, R. Beleggia, F. Fringuelli, F. Pizzo and L. Vaccaro, *J. Org. Chem.*, 2004, **69**, 2896

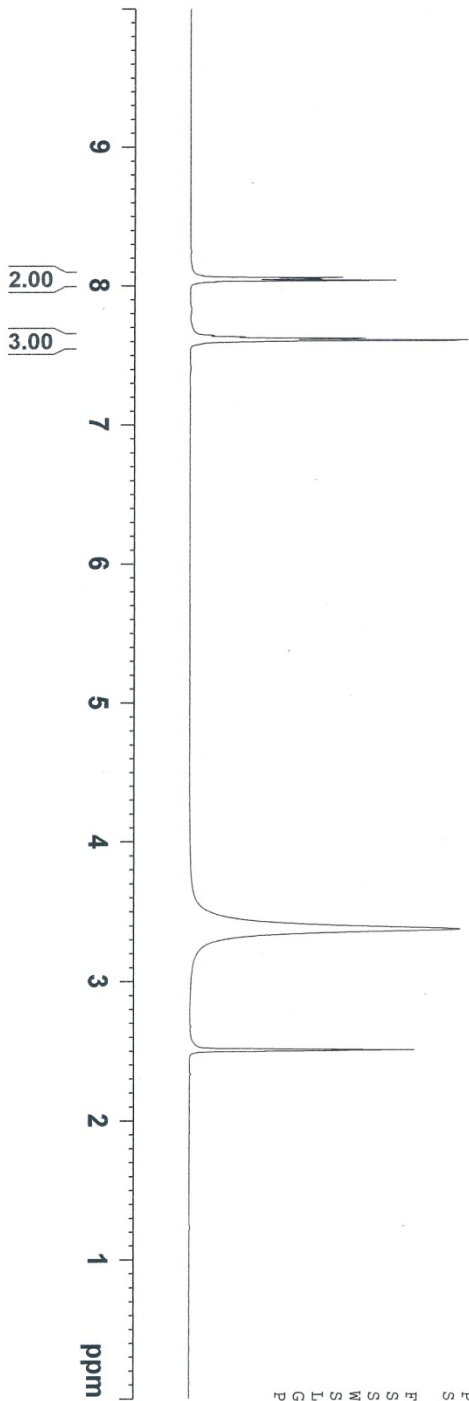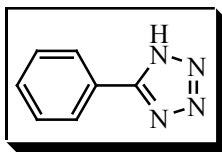

8.070  
 8.062  
 8.057  
 8.050  
 8.046  
 8.037  
 8.033  
 8.025  
 7.642  
 7.631  
 7.620  
 7.616  
 7.607  
 7.603  
 7.582

3.374  
 2.513  
 2.509  
 2.505  
 2.501  
 2.496

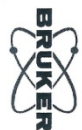

Current Data Parameters  
 NAME Dr. A MAJEE  
 EXPNO 710  
 PROCNO 1

F2 - Acquisition Parameters  
 Date\_ 20130520  
 Time 18.41

INSTRUM spect  
 PROBHD 5 mm PABBO BB/  
 PULPROG zg30

TD 32768  
 SOLVENT DMSO

NS 24  
 DS 2  
 SWH 8223.685 Hz  
 FIDRES 0.250967 Hz

AQ 1.9923444 sec  
 RG 106.66  
 DW 60.800 usec  
 DE 6.50 usec

TE 294.2 K  
 D1 1.00000000 sec  
 TD0 1

==== CHANNEL f1 =====  
 NUC1 1H  
 P1 14.75 usec  
 PLM1 11.9949989 W  
 SFO1 400.1524711 MHz

F2 - Processing parameters  
 SI 16384  
 SF 400.1500000 MHz  
 WDW EM  
 SSB 0  
 LB 0.30 Hz  
 GB 0  
 PC 1.00



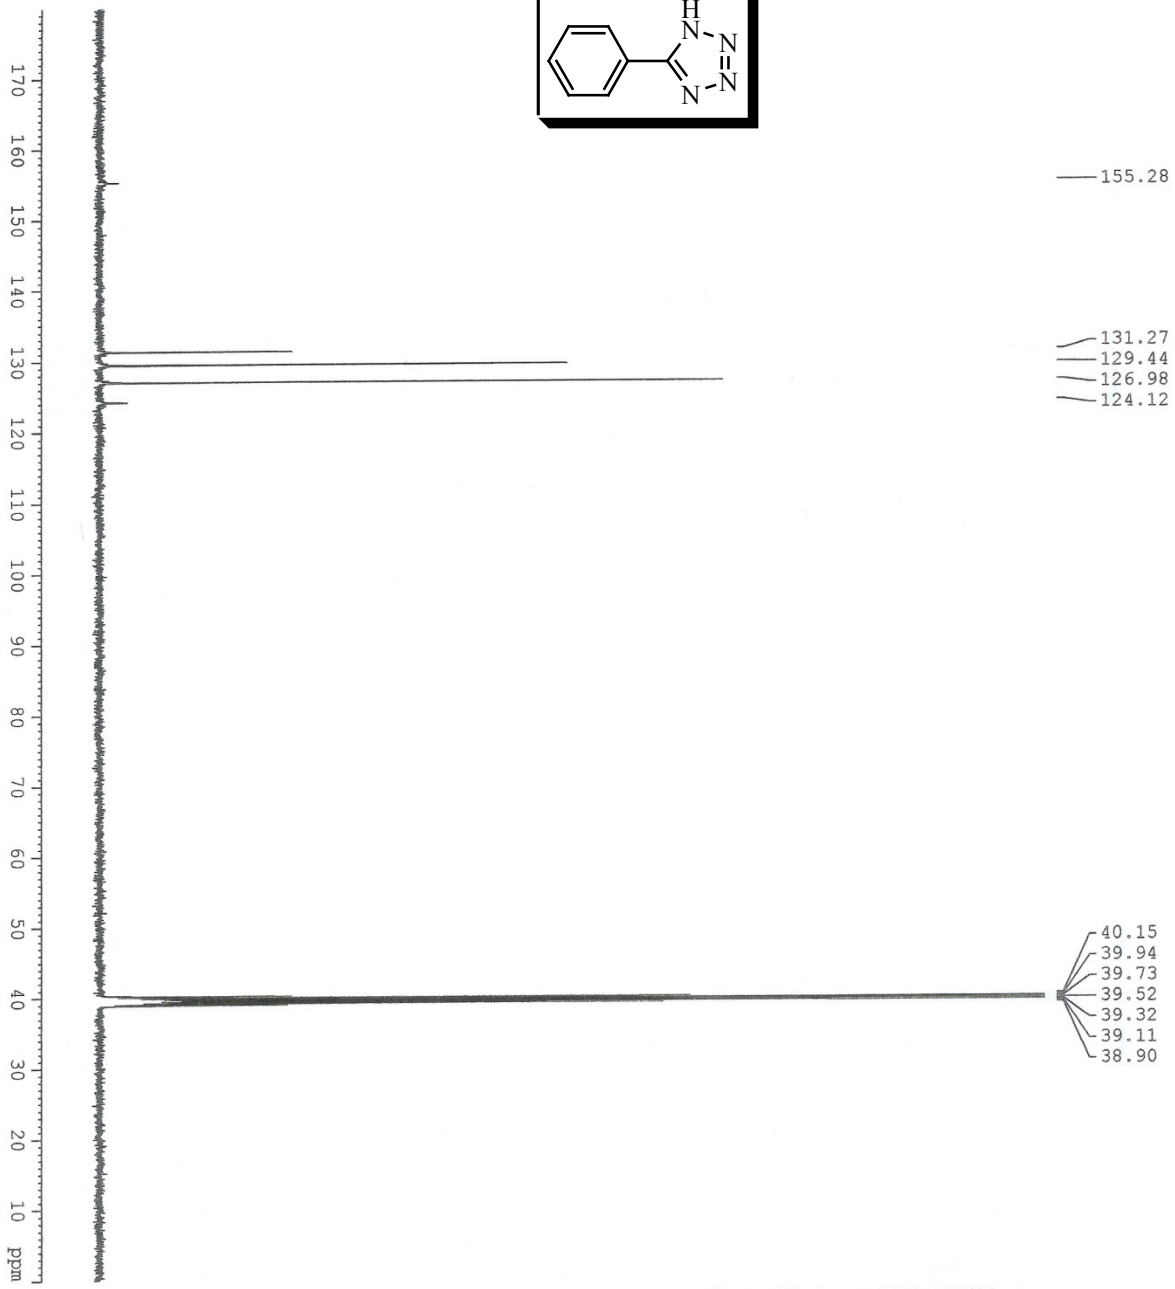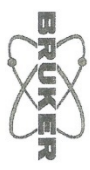

Current Data Parameters  
 NAME Dr. A MAJEE  
 EXNO 722  
 PROCNO 1

F2 - Acquisition Parameters

Date\_ 20130713  
 Time 10.27  
 INSTRUM spect  
 PROBHD 5 mm PABBO BB/  
 PULPROG zgpg30  
 TD 32768  
 SOLVENT DMSO  
 NS 1024  
 DS 2  
 SWH 24038.461 Hz  
 FIDRES 0.733596 Hz  
 AQ 0.6816244 sec  
 RG 87.66  
 DW 20.800 usec  
 DE 6.50 usec  
 TE 298.2 K  
 D1 2.0000000 sec  
 D11 0.0300000 sec  
 TD0 1

CHANNEL F1

NUC1 13C  
 P1 8.90 usec  
 PLW1 54.00000000 W  
 SFO1 100.6278588 MHz

CHANNEL F2

waltz16  
 INDC 1H  
 PCPD2 90.00 usec  
 PLW2 12.00000000 W  
 PLW12 0.40792999 W  
 PLW13 0.26107001 W  
 SFO2 400.1516006 MHz

F2 - Processing parameters

SI 16384  
 SF 100.6178426 MHz  
 WDW EM  
 SSB 0  
 LB 1.00 Hz  
 GB 0  
 PC 1.40

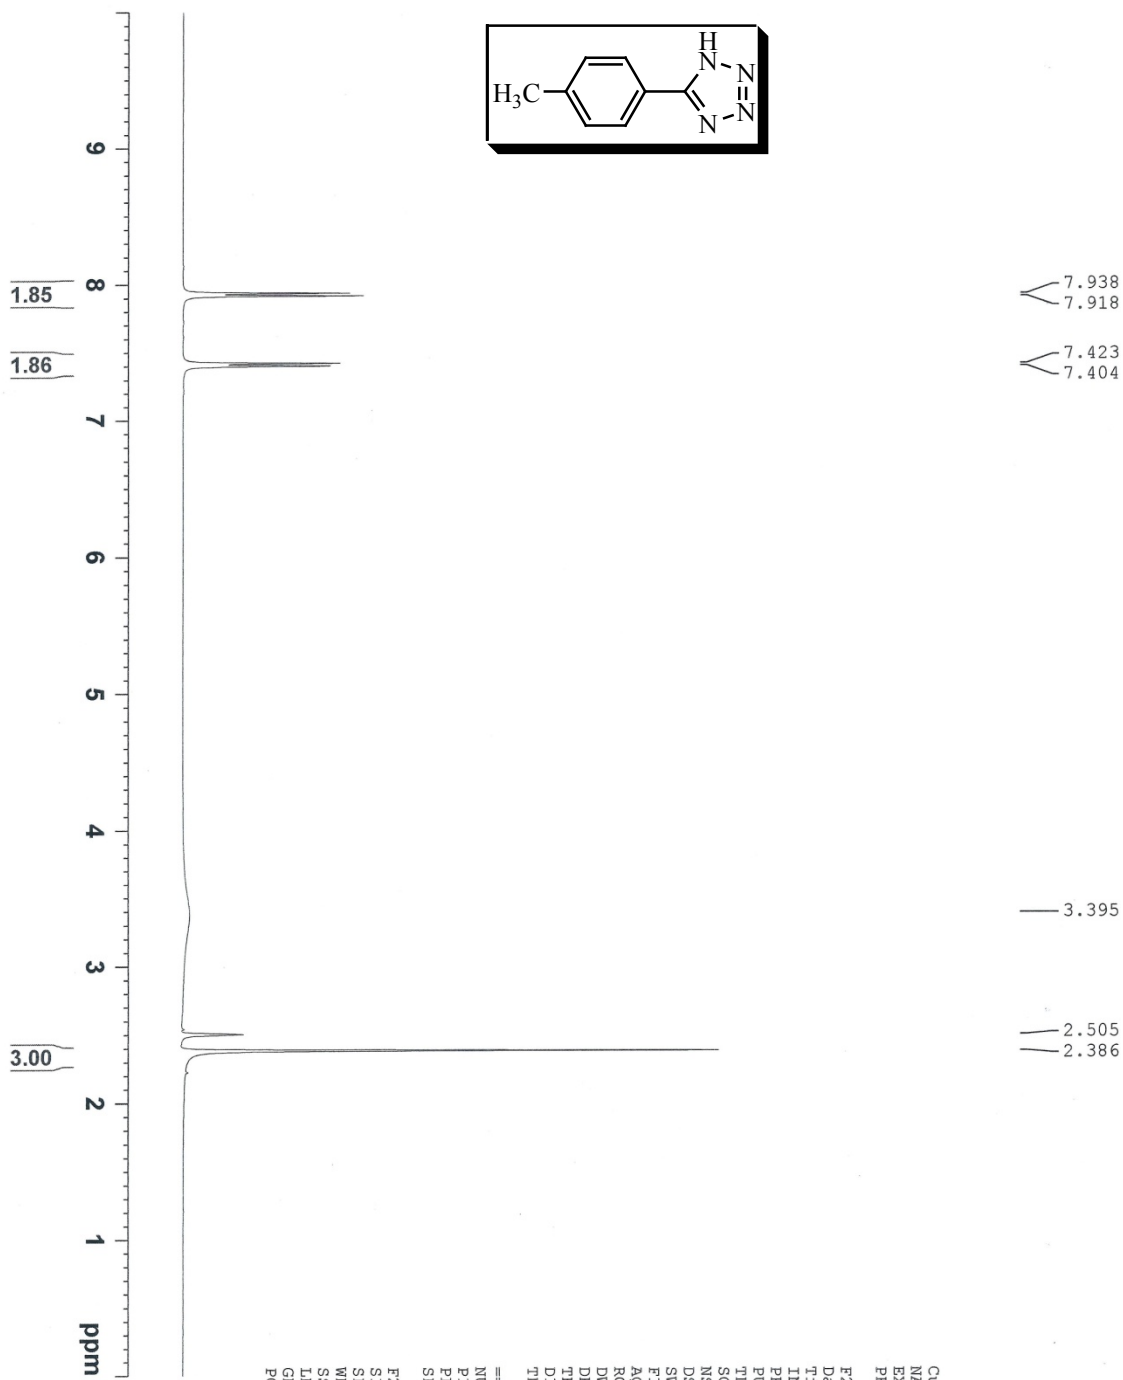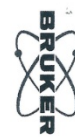

Current Data Parameters  
 NAME Dr. A MAJEE  
 EXPNO 711  
 PROCNO 1

F2 - Acquisition Parameters  
 Date\_ 20130520  
 Time 18.43  
 INSTRUM spect  
 PROBHD 5 mm PABBO BB/  
 PULPROG zg30  
 TD 32768  
 SOLVENT DMSO  
 NS 32  
 DS 2  
 SWH 8223.685 Hz  
 FIDRES 0.250967 Hz  
 AQ 1.9923444 sec  
 RG 33.46  
 DW 60.800 usec  
 DE 6.50 usec  
 TE 294.3 K  
 D1 1.00000000 sec  
 TDO 1

===== CHANNEL f1 =====  
 NUC1 1H  
 P1 14.75 usec  
 P1M1 11.99499989 W  
 SF01 400.1524711 MHz  
 F2 - Processing parameters  
 SI 16384  
 SF 400.1500000 MHz  
 WDW EM  
 SSB 0  
 LB 0.30 Hz  
 GB 0  
 PC 1.00

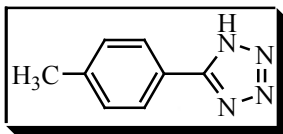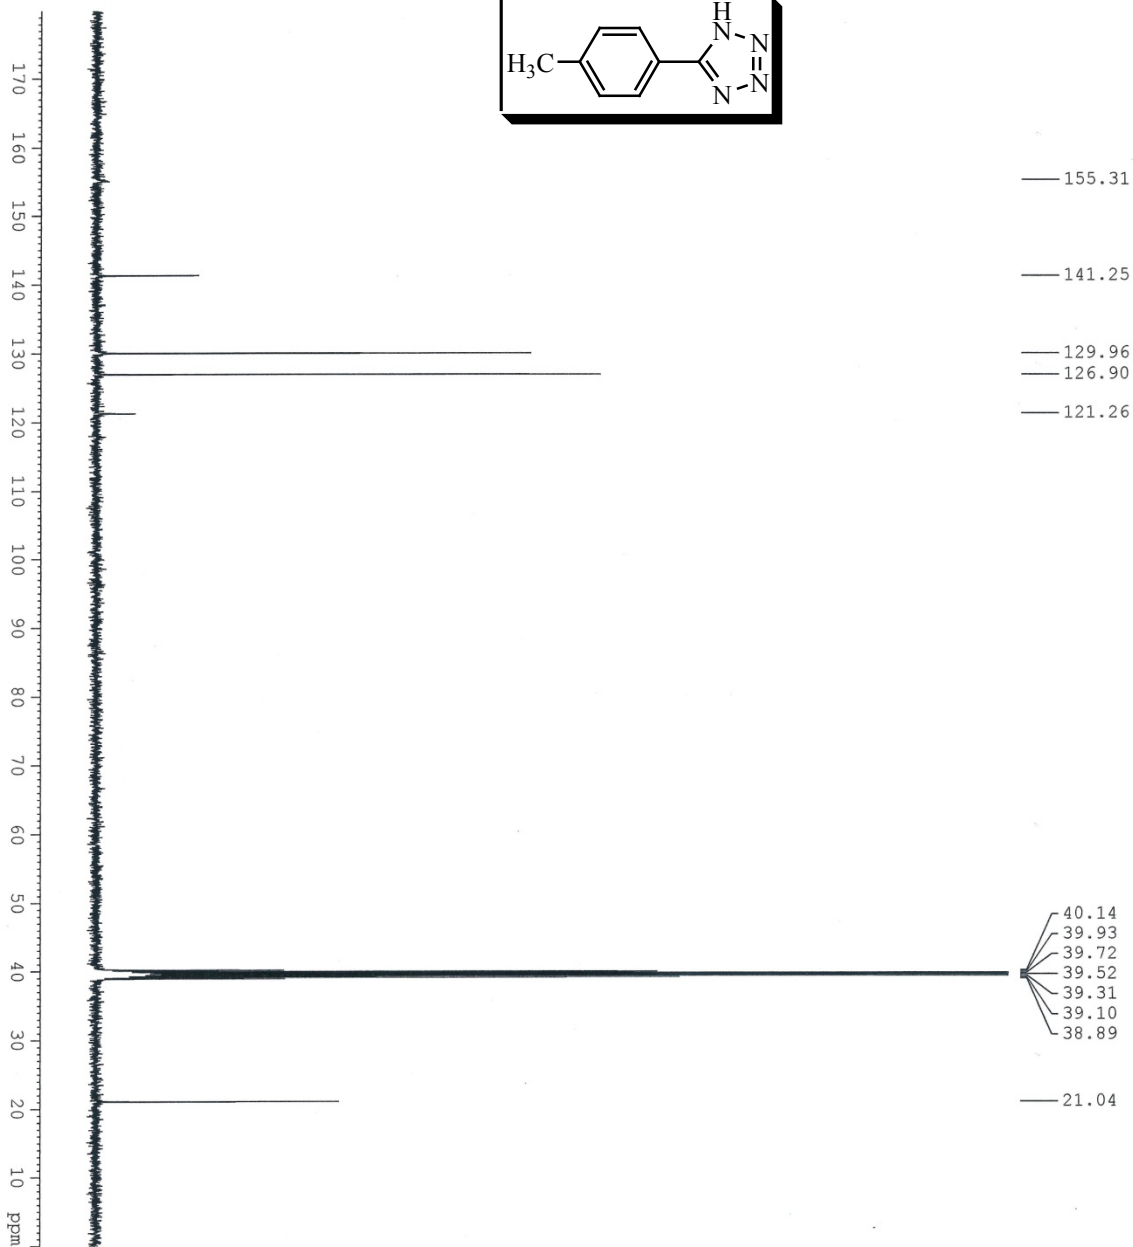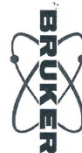

Current Data Parameters  
 NAME Dr. A MAJEE  
 EXPNO 725  
 PROCNO 1

F2 - Acquisition Parameters  
 Date\_ 20130521  
 Time 19.42

INSTRUM 5 mm PABBO BB/  
 SPECTR Spectr  
 PROBD 5 mm PABBO BB/  
 FIDFRMS zppg30  
 TD 32768  
 SFO2 400.1516096 MHz  
 SOLVENT DMSO  
 NS 400  
 DS 2  
 SWH 24038.461 Hz  
 FIDRES 0.733596 Hz  
 AQ 0.6816244 sec  
 RG 87.66  
 DW 20.800 usec  
 DE 6.50 usec  
 TE 297.6 K  
 D1 2.00000000 sec  
 D11 0.03000000 sec  
 TDO 1

===== CHANNEL f1 =====  
 NUCL 13C  
 P1 8.90 usec  
 PL1 54.00000000 W  
 SFO1 100.6278588 MHz

===== CHANNEL f2 =====  
 CPDPRG2 waltz16  
 NUC2 1H  
 PCPD2 80.00 usec  
 PLM2 12.00000000 W  
 PLM12 0.40792999 W  
 PLM13 0.26107001 W  
 SFO2 400.1516096 MHz

F2 - Processing parameters  
 SI 16394  
 SF 100.6178427 MHz  
 WDM EM  
 SSB 0  
 LB 1.00 Hz  
 GB 0  
 PC 1.40

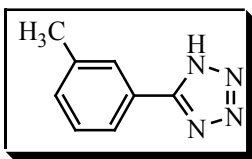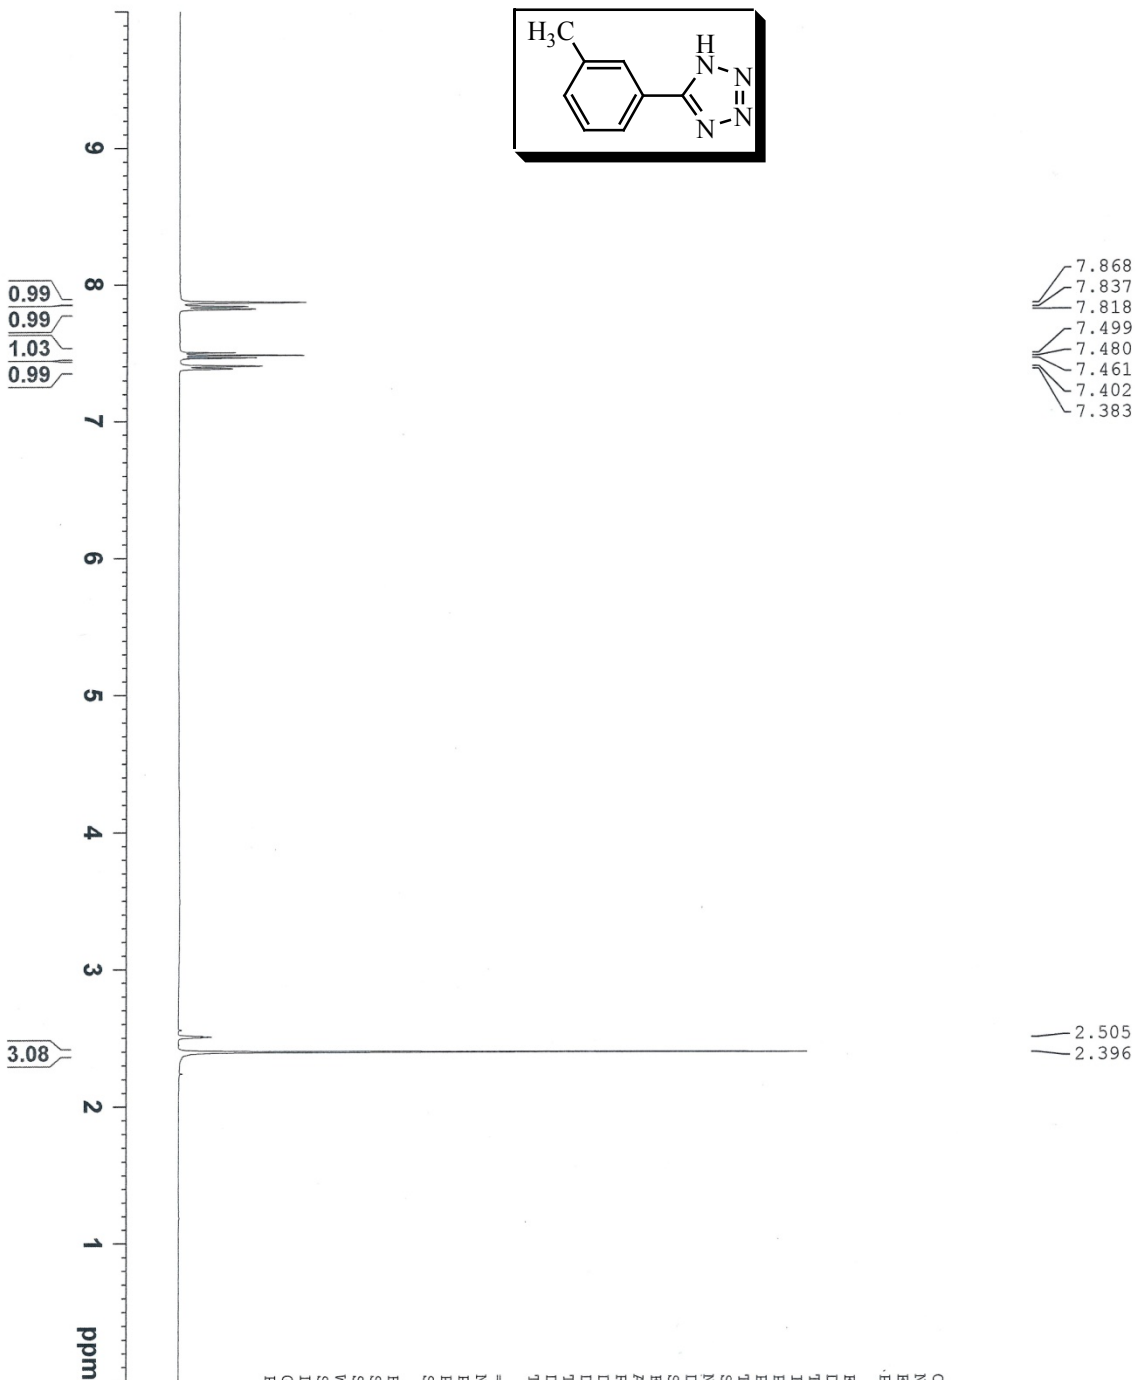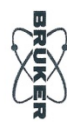

Current Data Parameters  
 NAME Dr. A RAJEE  
 EXPNO 714  
 PROCNO 1

F2 - Acquisition Parameters

Date\_ 20130520  
 Time 18.58  
 INSTRUM spect  
 PROBD 5 mm PABBO BB/  
 PULPROG zg30  
 TD 32768  
 SOLVENT DMSO  
 NS 32  
 DS 2  
 SWH 8223.685 Hz  
 FIDRES 0.250967 Hz  
 AQ 1.9923444 sec  
 RG 62.69  
 DW 60.800 usec  
 DE 6.50 usec  
 TE 294.4 K  
 DI 1.00000000 sec  
 TDO 1

===== CHANNEL f1 =====

NUC1 1H  
 P1 14.75 usec  
 PLM1 11.9949989 W  
 SFO1 400.1524711 MHz

F2 - Processing parameters

SI 16384  
 SF 400.1500000 MHz  
 WDW EM  
 SSB 0  
 LB 0.30 Hz  
 GB 0  
 PC 1.00

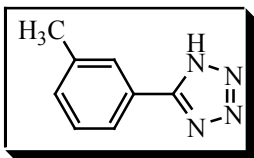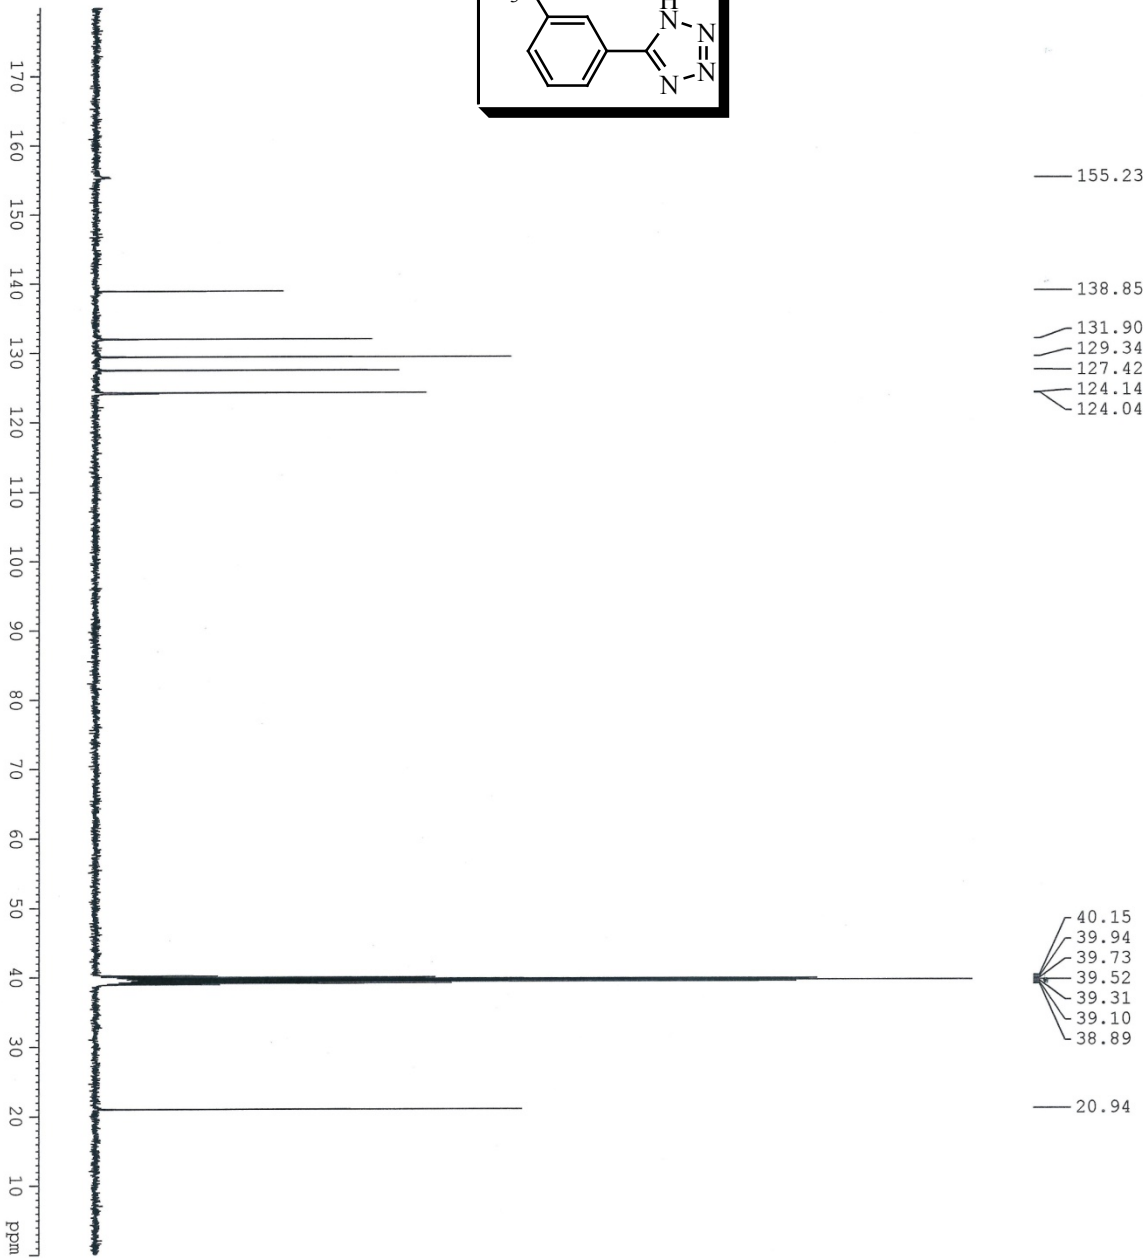

Current Data Parameters  
 NAME Dr. A MAJEE  
 EXPNO 718  
 PROCNO 1

F2 - Acquisition Parameters  
 Date\_ 20130521  
 Time 12.21  
 INSTRUM spect  
 PROBHD 5 mm PABBO BB/  
 PULPROG zgpg30  
 TD 32768  
 SOLVENT DMSO  
 NS 240  
 DS 2  
 SWH 24038.461 Hz  
 FIDRES 0.713329 Hz  
 AQ 0.6812743 sec  
 RG 2048  
 DS 20  
 DE 20.800 usec  
 TE 6.50 usec  
 TD 296.8 K  
 D1 2.00000000 sec  
 D11 0.03000000 sec  
 TDO 1

CHANNEL F1  
 NUC1 13C  
 P1 8.90 usec  
 PLM1 54.00000000 W  
 SFO1 100.6278588 MHz

CHANNEL F2  
 NUC2 1H  
 PCH2 80.00 usec  
 PLM2 12.00000000 W  
 PLM12 0.40792929 W  
 PLM13 0.26107001 W  
 SFO2 400.1516006 MHz

F2 - Processing parameters  
 SI 16384  
 SF 100.6178398 MHz  
 WDM EM  
 SSB 0  
 LB 1.00 Hz  
 GB 0  
 EC 1.40

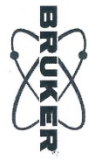

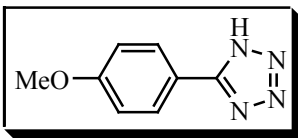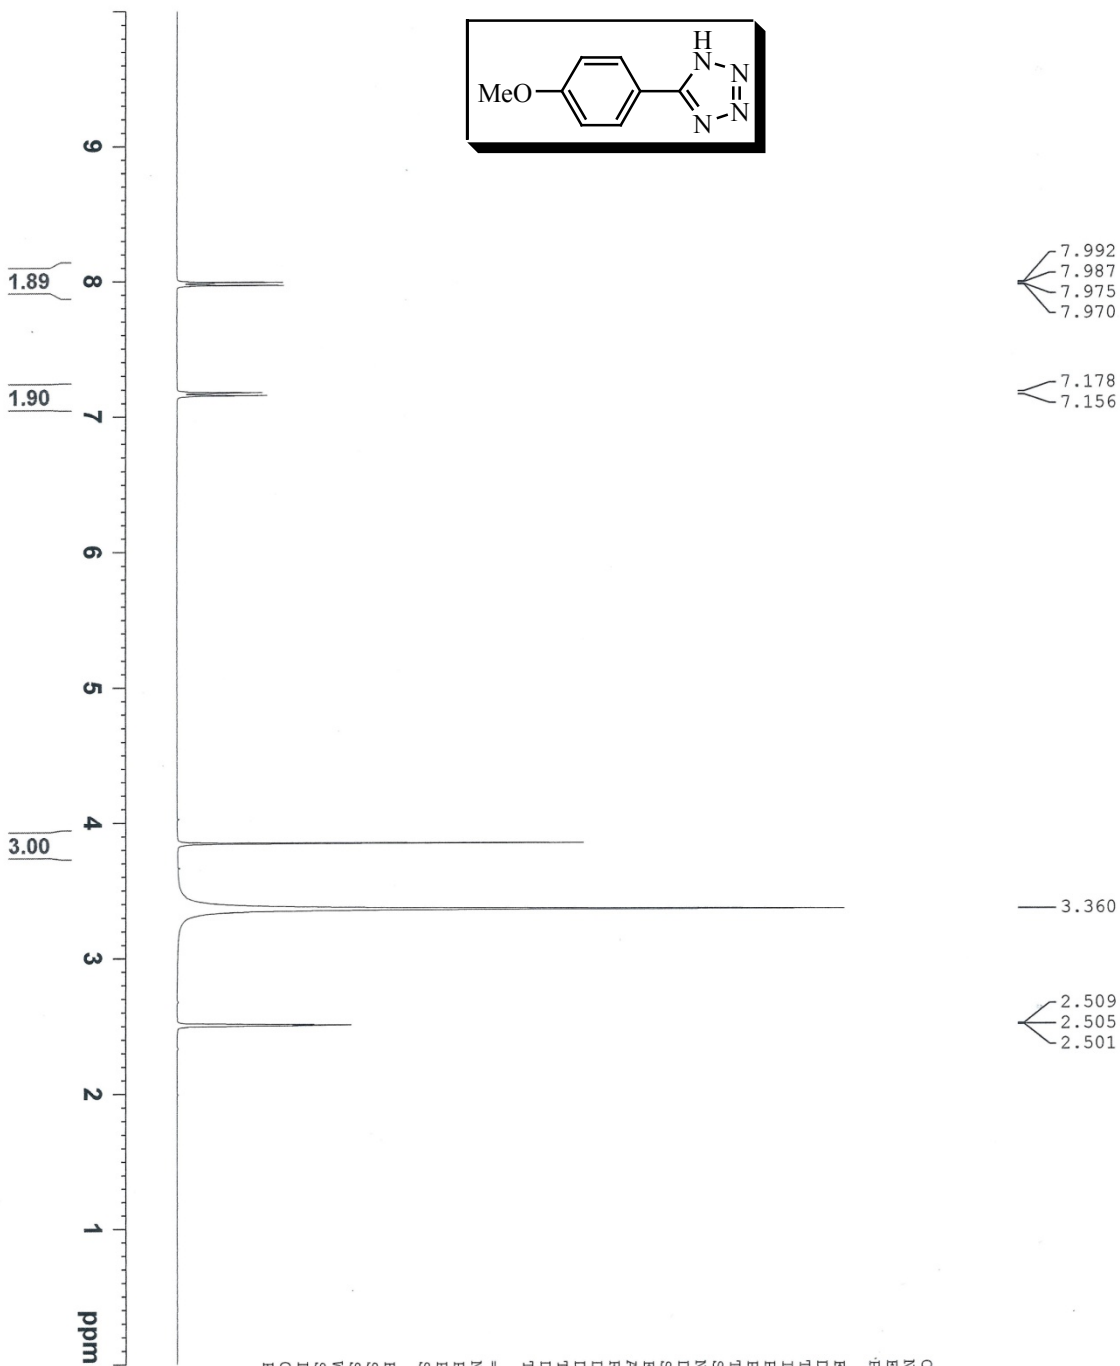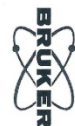

Current Data Parameters  
 NAME Dr. A MAJEE  
 EXPNO 708  
 PROCNO 1

F2 - Acquisition Parameters

Date\_ 20130520  
 Time 18.33  
 INSTRUM spect  
 PROBHD 5 mm PABBO BB/  
 PULPROG zg30  
 TD 32768  
 SOLVENT DMSO  
 NS 40  
 DS 2  
 SMH 8223.685 Hz  
 FIDRES 0.250967 Hz  
 AQ 1.9923444 sec  
 RG 87.66  
 DW 60.800 usec  
 DE 6.50 usec  
 TE 294.2 K  
 D1 1.00000000 sec  
 TDO 1

===== CHANNEL f1 =====

NUC1 1H  
 P1 14.75 usec  
 PLW1 11.99499989 W  
 SFO1 400.1524711 MHz  
 F2 - Processing parameters  
 SI 16384  
 SF 400.1500000 MHz  
 MDW EM  
 SSB 0  
 LB 0.30 Hz  
 GB 0  
 PC 1.00

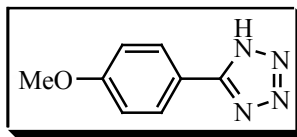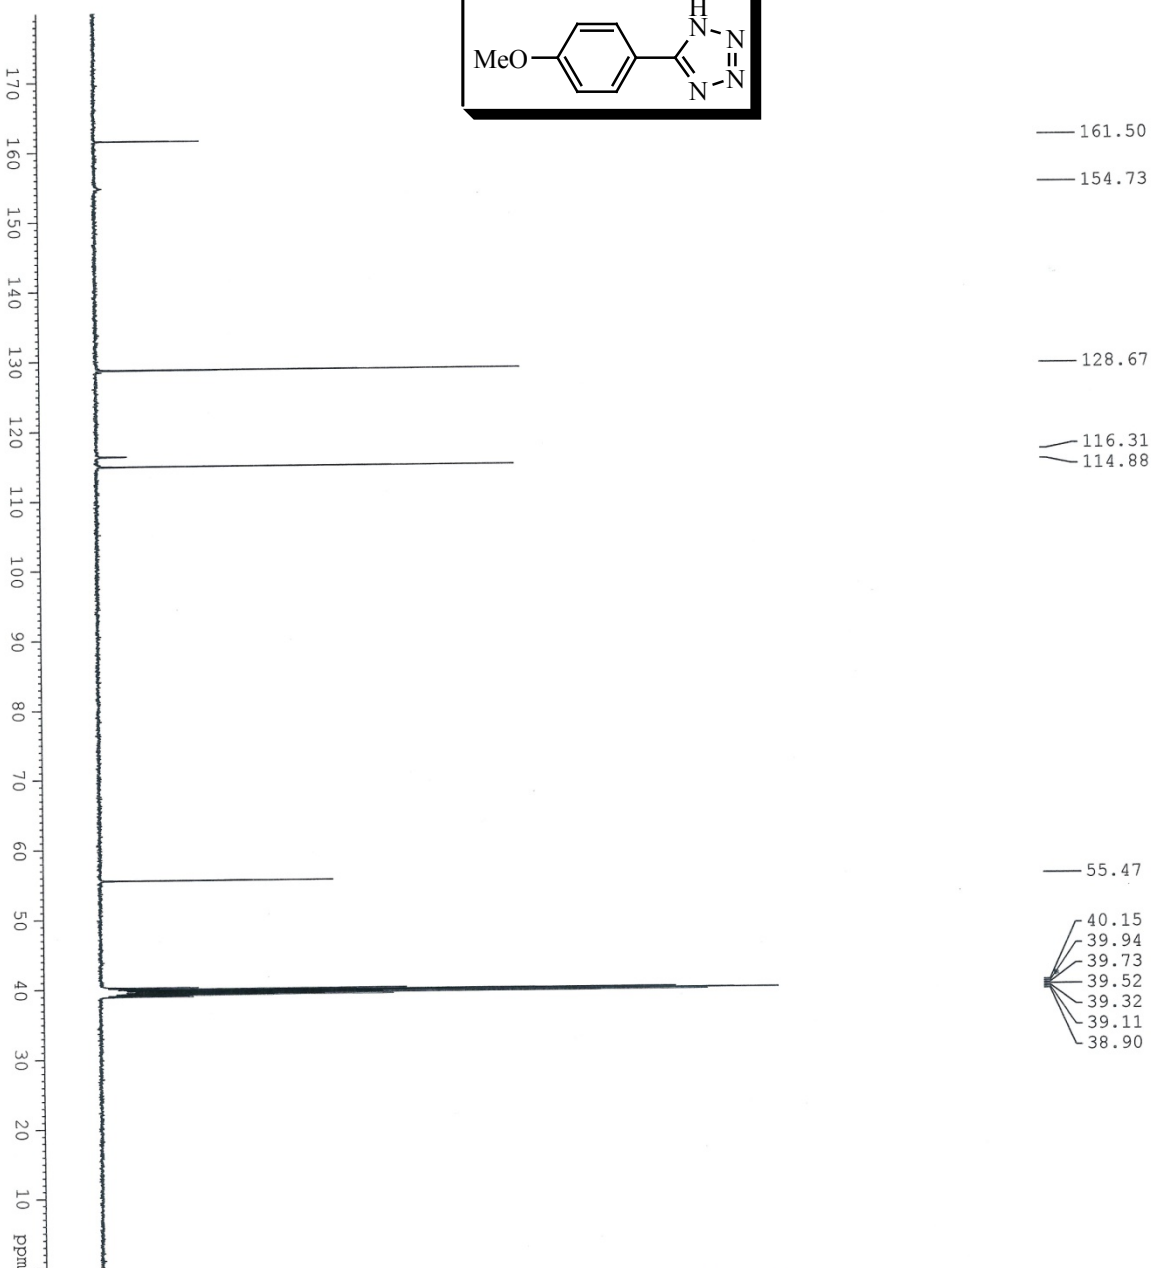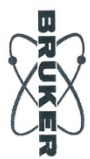

Current Data Parameters  
 NAME Dr. A WAJES  
 EXPNO 723  
 PROCNO 1

F2 - Acquisition Parameters

Date\_ 20130521  
 Time 18:11  
 Instrument spect  
 PROBHD 5 mm PABBO BB/  
 PULPROG zgpg30  
 TD 32768  
 SOLVENT DMSO  
 NS 640  
 DS 2  
 SWH 24038.461 Hz  
 FIDRES 0.733596 Hz  
 AQ 0.6816244 sec  
 RG 87.66  
 DW 20.800 usec  
 DE 6.50 usec  
 TE 297.5 K  
 D1 2.00000000 sec  
 D11 0.03000000 sec  
 TDO 1

==== CHANNEL F1 =====  
 NUC1 13C  
 P1 8.90 usec  
 PLW1 54.00000000 W  
 SFO1 100.6278588 MHz

==== CHANNEL F2 =====  
 CPDPRG2 waltz16  
 NUC2 1H  
 PCPDZ 80.00 usec  
 ELM2 12.00000000 W  
 ELM12 0.40782029 W  
 ELM13 0.26107001 W  
 SFO2 400.1516006 MHz

F2 - Processing parameters  
 SI 16384  
 WTW 100.6178398 MHz  
 SSB EM  
 LB 0 1.00 Hz  
 GB 0  
 PC 1.40

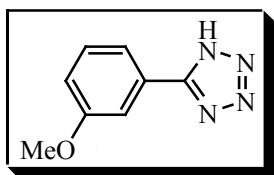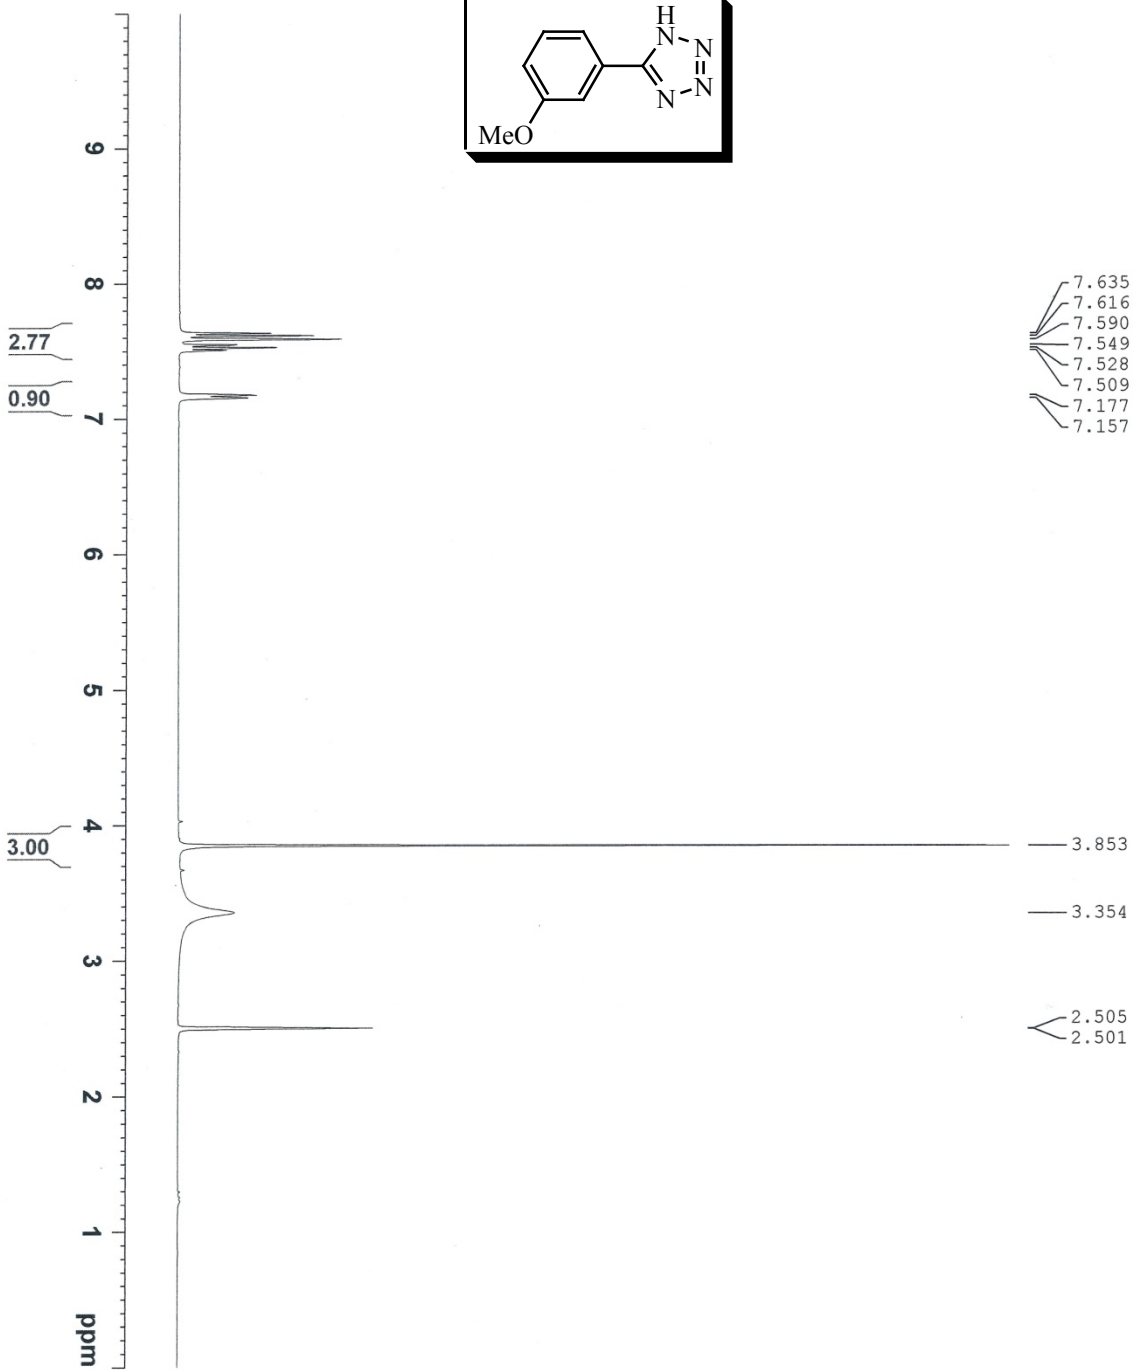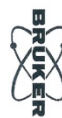

Current Data Parameters  
 NAME DE-A NAJEE  
 EXPNO 712  
 PROCNO 1

F2 - Acquisition Parameters

Date\_ 20130520  
 Time 18.49  
 INSTRUM spect  
 PROBD 5 mm PABBO\_BB/  
 PULPROG zg30  
 TD 32768  
 SOLVENT DMSO  
 NS 36  
 DS 2  
 SWH 8223.685 Hz  
 FIDRES 0.250967 Hz  
 AQ 1.9923444 sec  
 RG 87.66  
 DW 60.800 usec  
 DE 6.50 usec  
 TE 294.3 K  
 D1 1.00000000 sec  
 TDO 1

==== CHANNEL f1 =====

NUC1 1H  
 P1 14.75 usec  
 PLW1 11.99499989 W  
 SFO1 400.1524711 MHz

F2 - Processing parameters

SI 16384  
 SF 400.1500000 MHz  
 WDW EM  
 SSB 0  
 LB 0.30 Hz  
 GB 0  
 PC 1.00



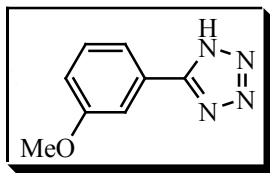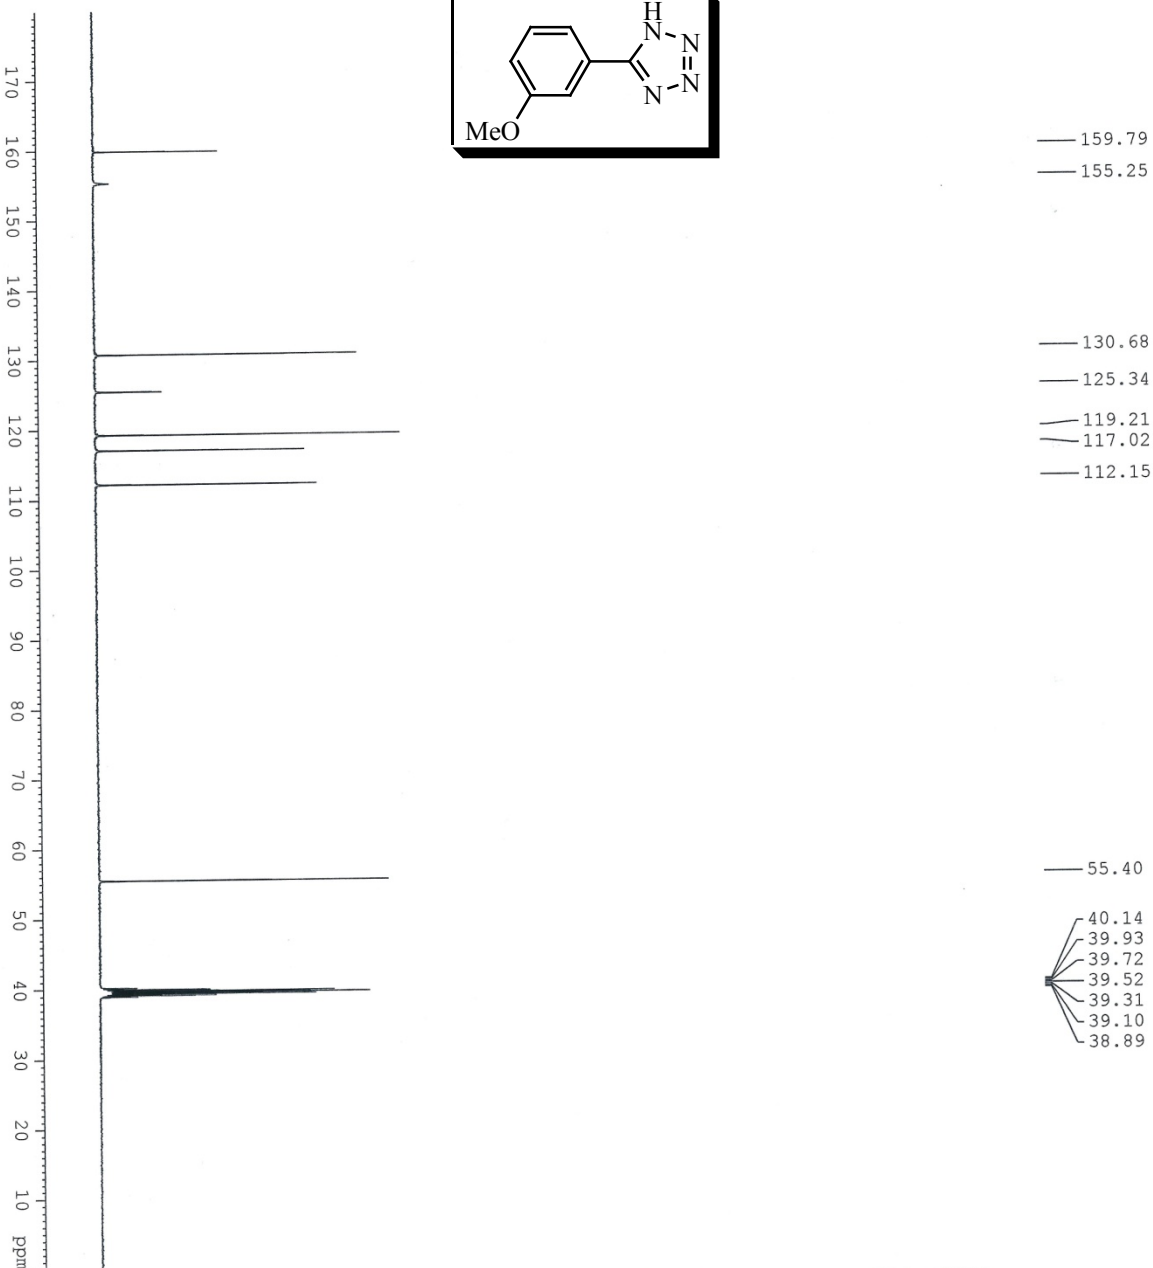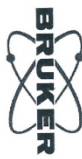

Current Data Parameters  
 NAME Dr. A MAJEE  
 EXPNO 726  
 PROCNO 1

F2 - Acquisition Parameters

Date\_ 20130521  
 Time\_ 20.15  
 INSTRUM spect  
 PROBHD 5 mm PABBO BB/  
 PULPROG zgpg30  
 TD 32768  
 SOLVENT DMSO  
 NS 400  
 DS 2  
 SWH 24038.461 Hz  
 FIDRES 0.733596 Hz  
 AQ 0.6816244 sec  
 RG 87.66  
 DW 20.800 usec  
 DE 6.50 usec  
 TE 297.2 K  
 D1 2.00000000 sec  
 D11 0.03000000 sec  
 TDO 1

CHANNEL F1

NUC1 13C  
 P1 8.00 usec  
 PLM1 54.00000000 W  
 SFO1 100.6278989 MHz

CHANNEL F2

NUC2 1H  
 P2 80.00 usec  
 PLM2 12.00000000 W  
 SFO2 400.1516006 MHz

F2 - Processing parameters

SI 16384  
 SF 100.6178354 MHz  
 WDW EM  
 SSB 0  
 LB 1.00 Hz  
 GB 0  
 PC 1.40

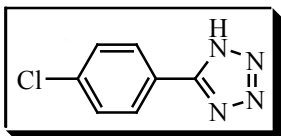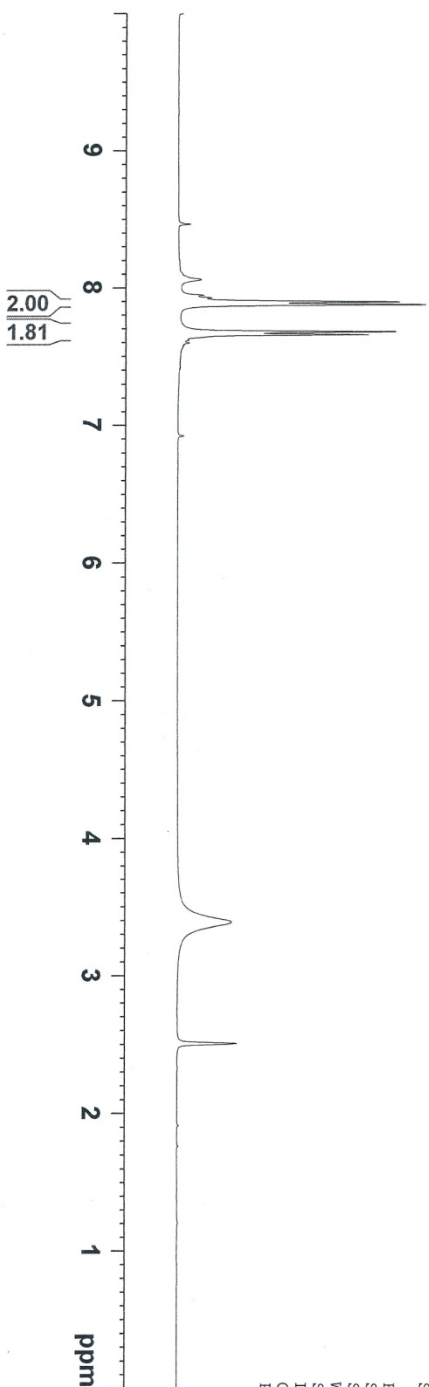

7.896  
 7.876  
 7.677  
 7.656

3.386

2.505

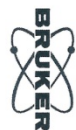

Current Data Parameters  
 NAME Dr. A MAJBE  
 EXPNO 715  
 PROCNO 1

F2 - Acquisition Parameters  
 Date\_ 20130520  
 Time\_ 19.02

INSTRUM spect  
 PROBD 5 mm PABBO BB/  
 PULPROG zg30  
 TD 32768  
 SOLVENT DMSO  
 NS 32

DS 2  
 SWH 8223.685 Hz  
 FIDRES 0.250967 Hz  
 AQ 1.9923444 sec  
 RG 67.81  
 DW 60.800 usec  
 DE 6.50 usec  
 TE 294.5 K  
 D1 1.00000000 sec  
 TD0 1

===== CHANNEL f1 =====  
 NUC1 1H  
 P1 14.75 usec  
 P1M1 11.9949989 W  
 SFO1 400.1524711 MHz

F2 - Processing parameters  
 SI 16384  
 SF 400.1500000 MHz  
 WDW EM  
 SSB 0  
 LB 0.30 Hz  
 GB 0  
 PC 1.00

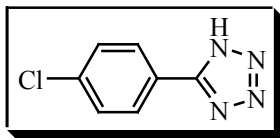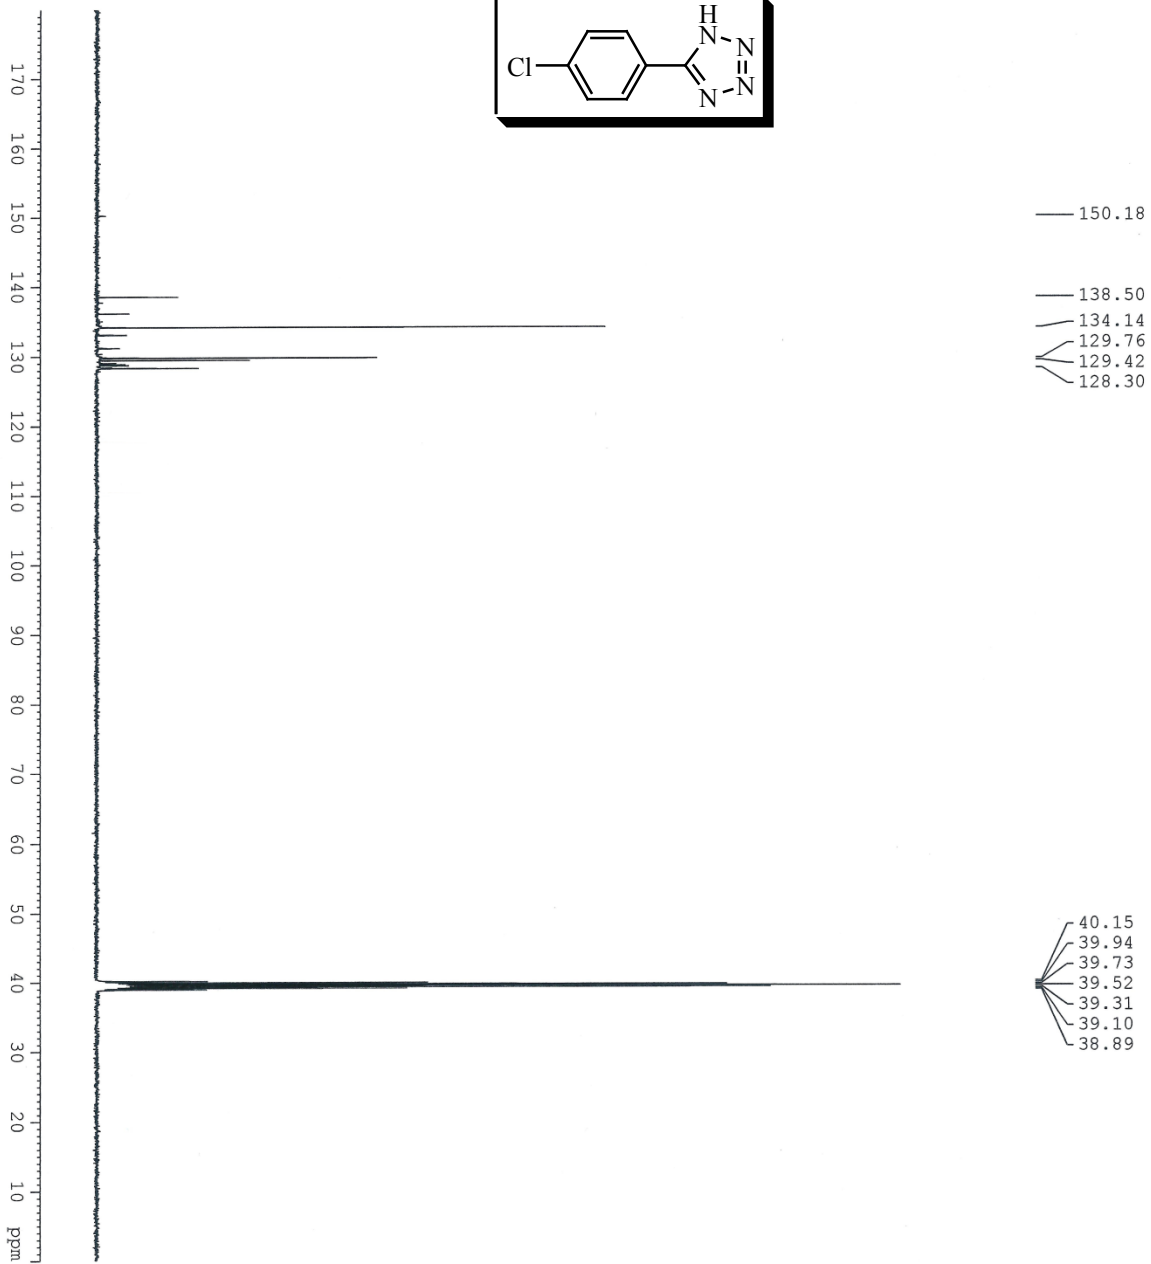

150.18  
 138.50  
 134.14  
 129.76  
 129.42  
 128.30

40.15  
 39.94  
 39.73  
 39.52  
 39.31  
 39.10  
 38.89

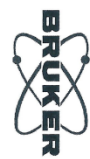

Current Data Parameters  
 NAME Dr. A. MAJEE  
 EXNO 728  
 PROCNO 1

F2 - Acquisition Parameters

Date\_ 20130522  
 Time\_ 11.17  
 INSTRUM spect  
 PROBHD 5 mm PABBO BB/  
 PULPROG zgpg30  
 TD 32768  
 SOLVENT DMSO  
 NS 400  
 DS 2  
 SWH 24038.461 Hz  
 FIDRES 0.733596 Hz  
 AQ 0.6816244 sec  
 RG 87.66  
 DW 20.800 usec  
 DE 6.50 usec  
 TE 296.6 K  
 D1 2.0000000 sec  
 D11 0.0300000 sec  
 TD0 1

CHANNEL F1  
 NUC1 13C  
 P1 8.90 usec  
 P1M1 54.0000000 W  
 SFO1 100.6278588 MHz

CHANNEL F2  
 CPDPRG2 waltz16  
 NUC2 1H  
 PCPD2 80.00 usec  
 PFM2 12.00000000 W  
 EFM12 0.40792999 W  
 EFM13 0.26107001 W  
 SFO2 400.1516006 MHz

F2 - Processing parameters  
 SI 16384  
 SF 100.6178413 MHz  
 WDW EM  
 SSB 0  
 LB 1.00 Hz  
 GB 0  
 PC 1.40

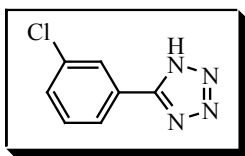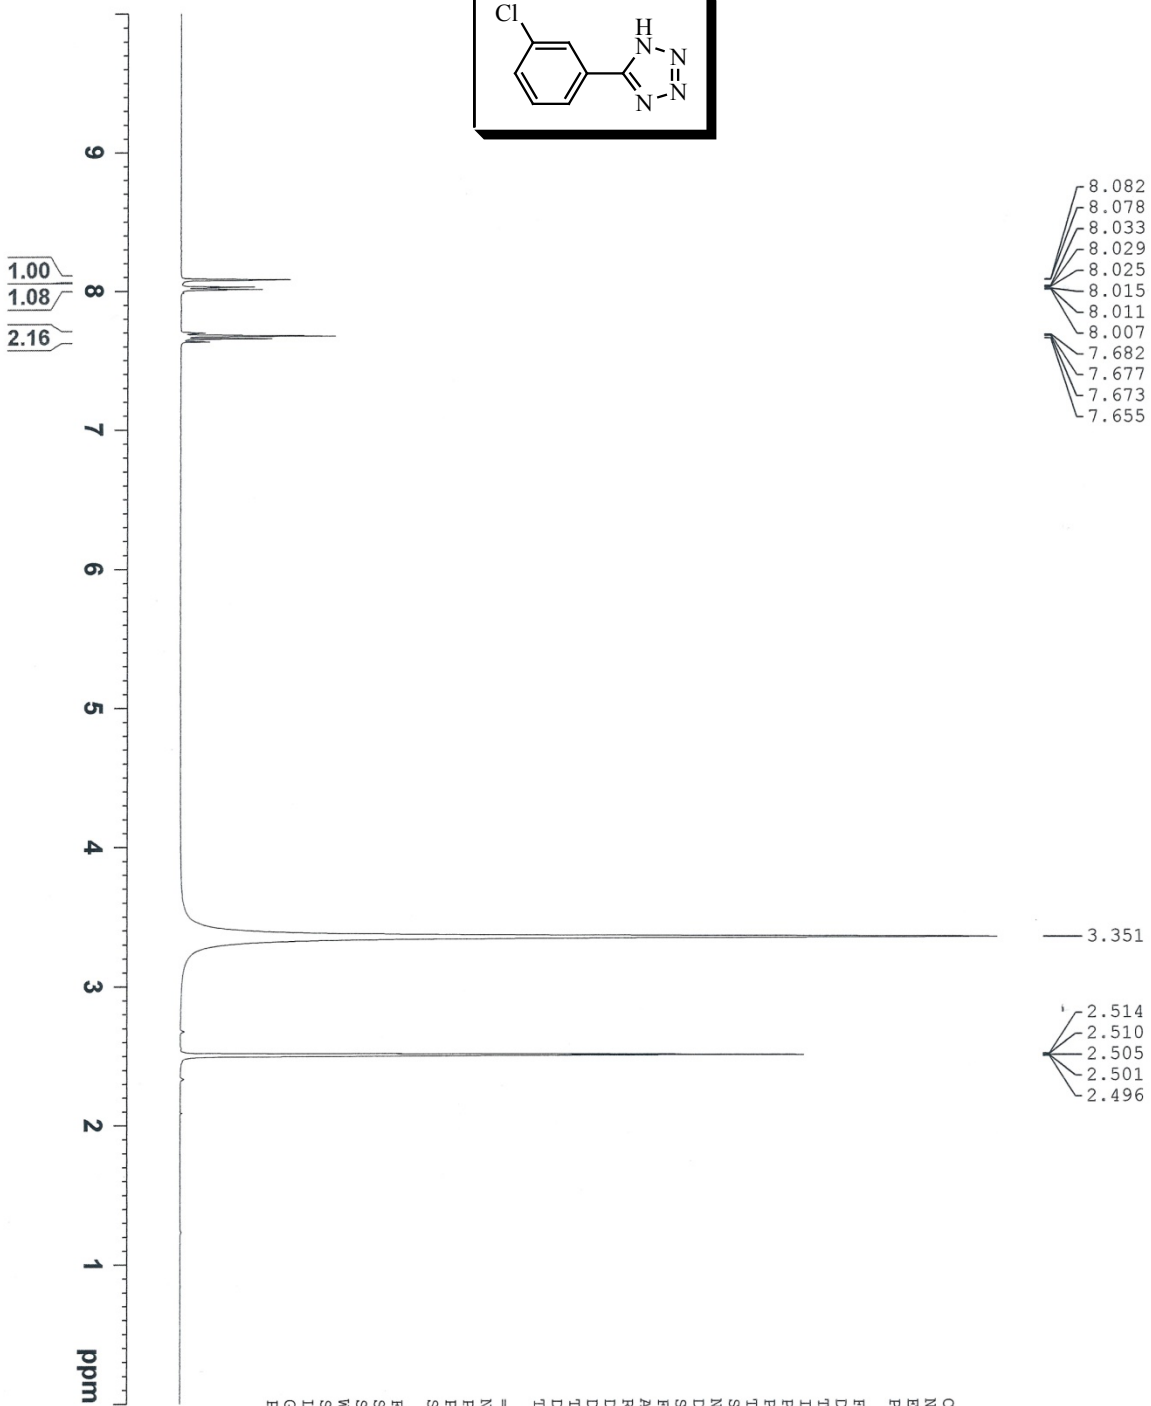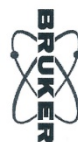

Current Data Parameters  
 NAME DF. A HAJES  
 EXPNO 713  
 PROCNO 1

F2 - Acquisition Parameters

Date\_ 20130520  
 Time 18.54  
 INSPRM spect  
 PROBHD 5 mm PABBO BB/  
 PULPROG zg30  
 TD 32768  
 SOLVENT DMSO  
 NS 32  
 DS 2  
 SWH 8223.685 Hz  
 FIDRES 0.250967 Hz  
 AQ 1.9923444 sec  
 RG 87.66  
 DW 60.800 usec  
 DE 6.50 usec  
 TE 294.4 K  
 D1 1.00000000 sec  
 TDO 1

===== CHANNEL f1 =====

NUC1 1H  
 P1 14.75 usec  
 PLM1 11.99499989 W  
 SFO1 400.1524711 MHz  
 F2 - Processing parameters  
 SI 16384  
 SF 400.1500000 MHz  
 WDW EM  
 SSB 0  
 LB 0.30 Hz  
 GB 0  
 PC 1.00

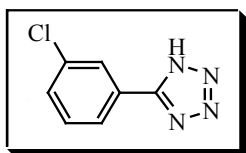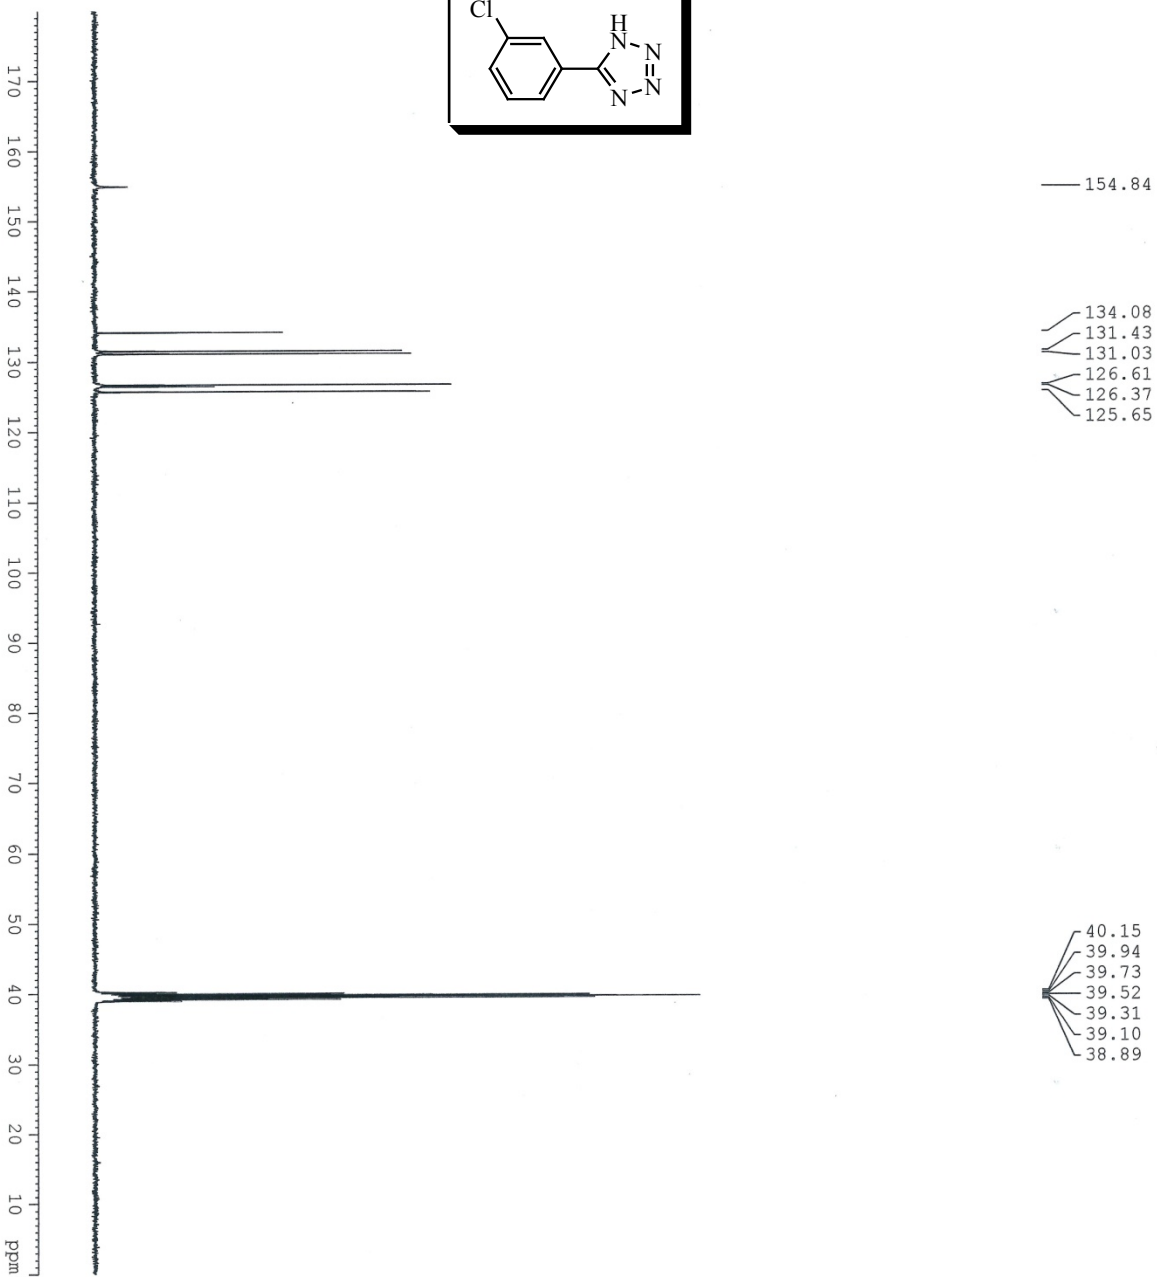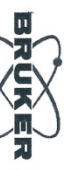

Current Data Parameters  
 NAME Dr. A MAJEE  
 EXNO 724  
 PROCNO 1

F2 - Acquisition Parameters

Date\_ 20130521  
 Time 18.48  
 INSTRUM spect  
 PROBHD 5 mm PABBO BBI  
 PULPROG zgpg30  
 FID 32  
 SOLVENT DMSO  
 NS 400  
 DS 2  
 SWH 24038.461 Hz  
 FIDRES 0.73396 Hz  
 AQ 0.6816244 sec  
 RG 87.66  
 DW 20.800 usec  
 DE 6.50 usec  
 TE 297.5 K  
 D1 2.0000000 sec  
 D11 0.0300000 sec  
 TDO 1

CHANNEL F1  
 NUC1 13C  
 P1 8.90 usec  
 PLM1 54.0000000 W  
 SFO1 100.6278588 MHz

CHANNEL F2  
 waltz16  
 NUC2 1H  
 PCPD2 80.00 usec  
 PLM2 12.0000000 W  
 PLM12 0.40792999 W  
 PLM13 0.26107001 W  
 SFO2 400.1516006 MHz

F2 - Processing parameters  
 SI 16384  
 SF 100.6178353 MHz  
 WDW EM  
 SSB 0  
 LB 1.00 Hz  
 GB 0  
 PC 1.40

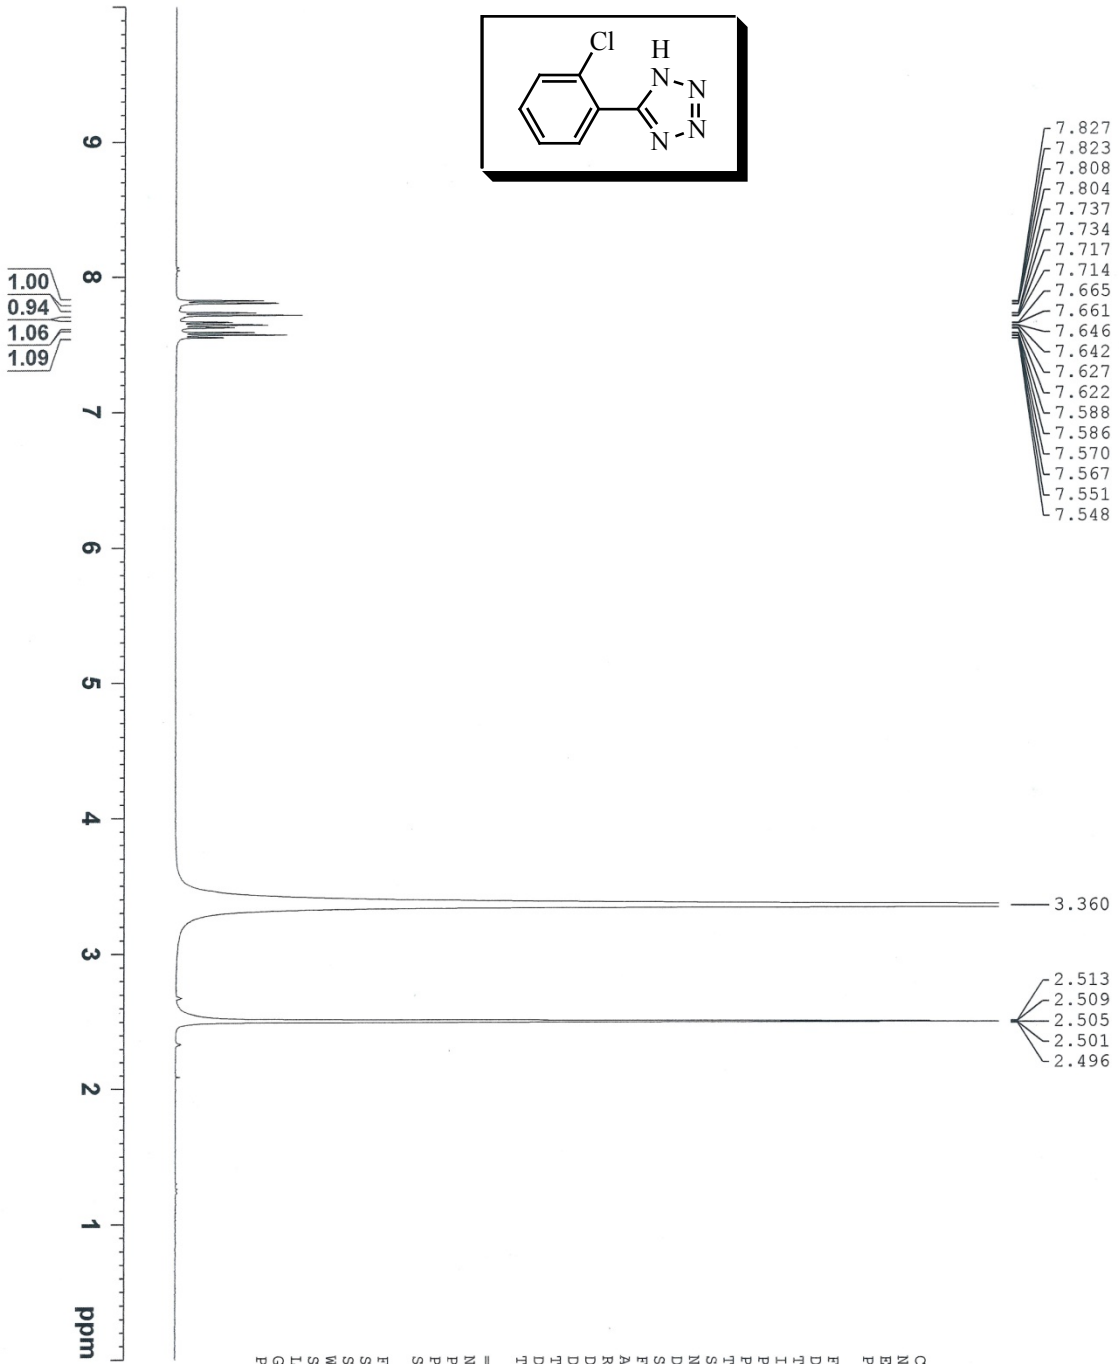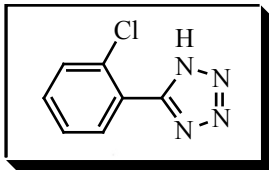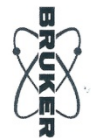

Current Data Parameters  
 NAME Dr. A MAJEE  
 EXPNO 709  
 PROCNO 1

F2 - Acquisition Parameters

Date\_ 20130520  
 Time\_ 18.37  
 INSTRUM spect  
 PROBD 5 mm PABBO BB/  
 PULPROG zg30  
 TD 32768  
 SOLVENT DMSO  
 NS 40  
 DS 2  
 SWH 8223.685 Hz  
 FIDRES 0.250967 Hz  
 AQ 1.9923444 sec  
 RG 87.66  
 DW 60.800 usec  
 DE 6.50 usec  
 TE 294.2 K  
 D1 1.00000000 sec  
 TD0 1

===== CHANNEL f1 =====

NUC1 1H  
 P1 14.75 usec  
 PLW1 11.9949989 W  
 SF01 400.1524711 MHz

F2 - Processing Parameters

SI 16384  
 SF 400.1500000 MHz  
 WDM EM  
 SSB 0  
 LB 0.30 Hz  
 GB 0  
 PC 1.00

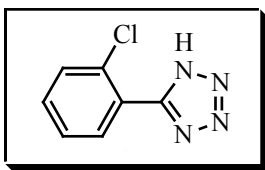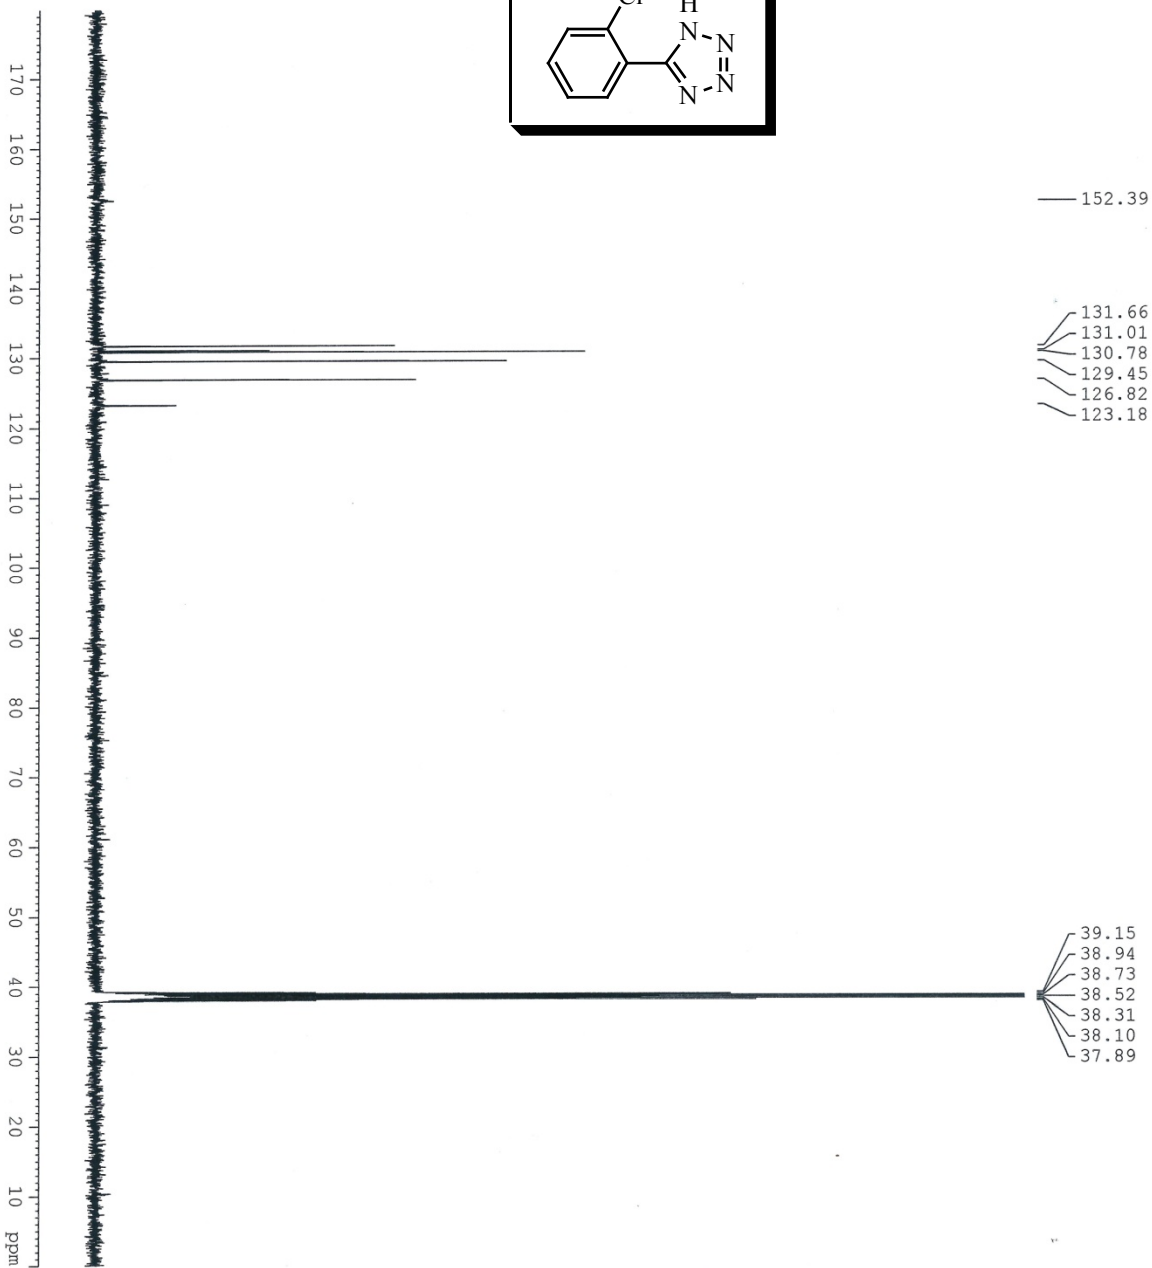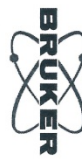

Current Data Parameters  
 NAME Dr. A MAJEE  
 EXPNO 727  
 PROCNO 1

F2 - Acquisition Parameters

Date\_ 20130521  
 Time 20.40  
 INSTRUM spect  
 PROBHD 5 mm EBBBO BB/  
 PULPROG zgpg30  
 TD 32768  
 SOLVENT DMSO  
 NS 400  
 DS 2  
 SWH 24038.461 Hz  
 FIDRES 0.733596 Hz  
 AQ 0.6816244 sec  
 RG 87.66  
 DW 20.800 usec  
 DE 6.50 usec  
 TE 296.7 K  
 D1 2.0000000 sec  
 D11 0.0300000 sec  
 TD0 1

CHANNEL F1  
 NUC1 13C  
 P1 8.90 usec  
 PLM1 54.00000000 W  
 SFO1 100.6278588 MHz

CHANNEL F2  
 CPDPRG2 waltz16  
 NUC2 1H  
 PCPP2 80.00 usec  
 PLM2 12.00000000 W  
 PLM12 0.40792999 W  
 PLM13 0.26107001 W  
 SFO2 400.1516006 MHz

F2 - Processing Parameters

SI 16384  
 SF 100.6179419 MHz  
 EM  
 WDW 0  
 SSB 0  
 LB 1.00 Hz  
 GB 0  
 PC 1.40

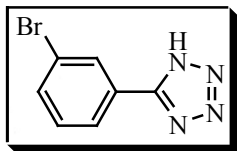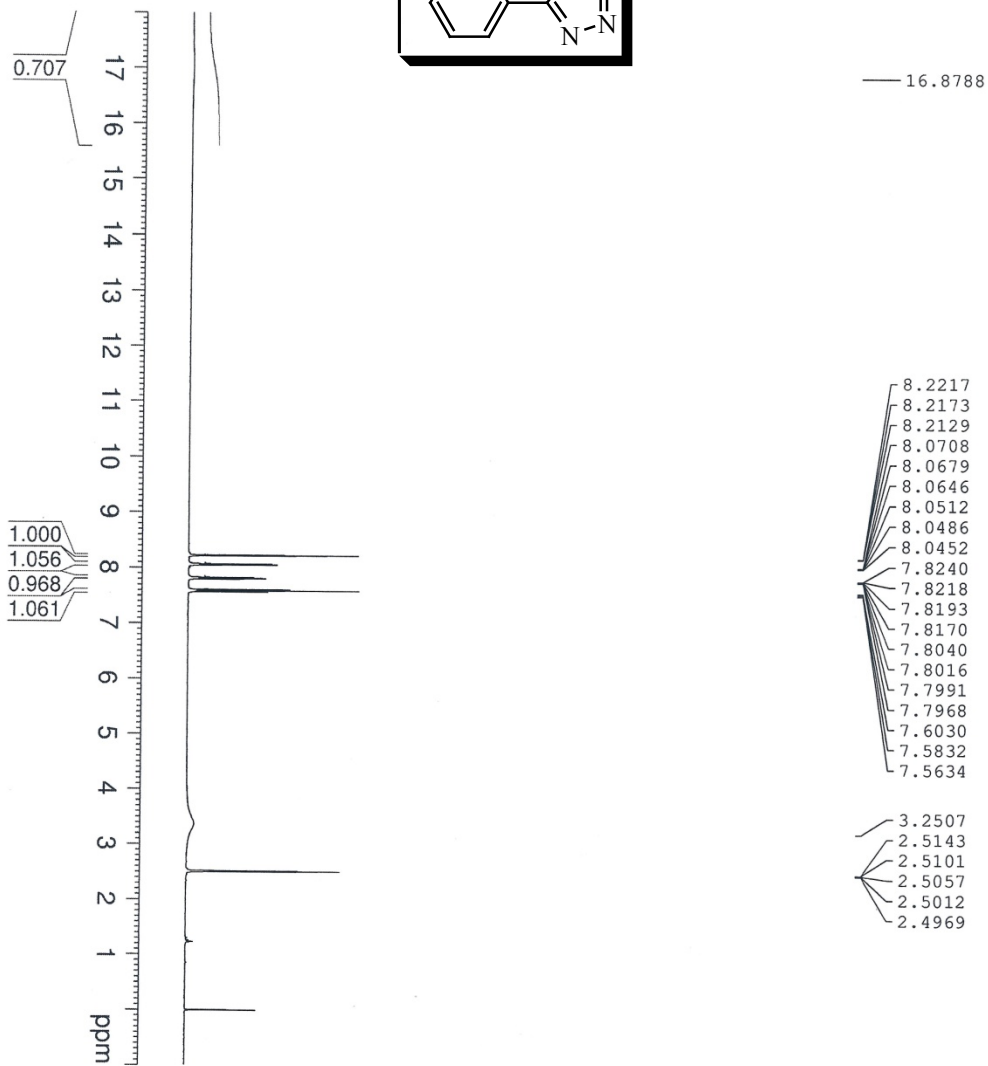

```

NAME          VBMR-2-A326869
EXPNO         1
PROCNO        1
Date_         20120130
Time          12.43
INSTRUM       spect
PROBHD        5 mm PABBO BB-
PULPROG       zg30
TD            32768
SOLVENT       DMSO
NS            16
DS            2
SWH           10000.000 Hz
FIDRES        0.305176 Hz
AQ            1.6384500 sec
RG            287
DE            50.000 usec
TE            293.0 K
D1            2.00000000 sec
TD0           1

===== CHANNEL f1 =====
NUC1          1H
P1            13.93 usec
PL1          -1.00 dB
PL1W         11.92178631 W
SF01         400.3136028 MHz
SI           32768
SF           400.3100000 MHz
WDW           EM
SSB           0
LB           0.30 Hz
GB           0
PC           1.00
    
```



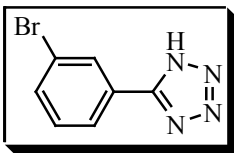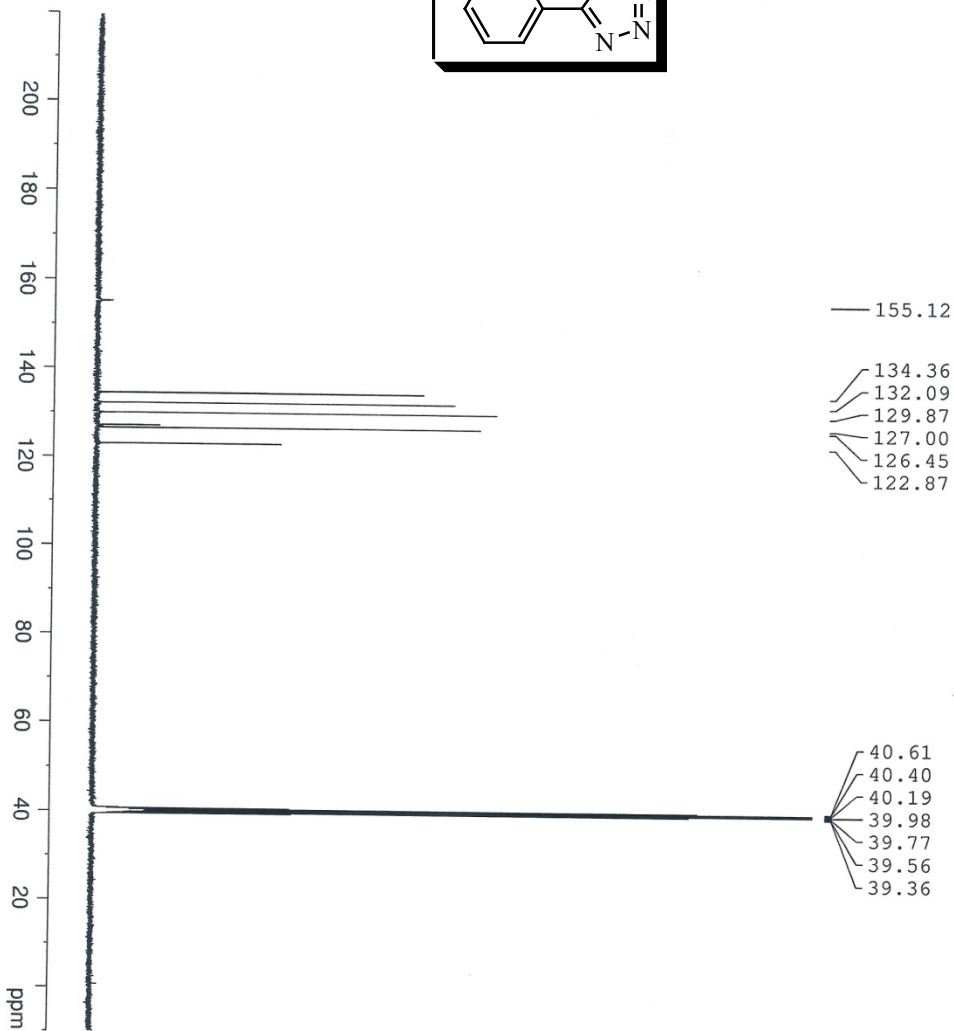

```

=====
NAME          VBMR-2-A326869
EXPNO         2
PROCNO        1
Date_         20120131
Time          1.54
INSTRUM       spect
PROBHD        5 mm PABBO BB-
PULPROG       zgpg30
TD            32768
SOLVENT       DMSO
NS            2048
DS            4
SMH           24038.461 Hz
FIDRES        0.733596 Hz
AQ            0.6816244 sec
RG            2050
DW            20.800 usec
DE            6.90 usec
TE            293.0 K
D1            2.00000000 sec
D11           0.03000000 sec
TD0           1

===== CHANNEL f1 =====
NUC1          13C
P1            7.75 usec
PL1           -2.00 dB
PL1W          57.32743073 W
SFO1          100.6680954 MHz

===== CHANNEL f2 =====
CPDPRG2      waltz16
NUC2          1H
PCPD2        80.00 usec
PL2           -1.00 dB
PL12         14.18 dB
PL13         15.00 dB
PL12W        11.92178631 W
PL13W        0.36169401 W
SFO2         400.3116012 MHz
SI           32768
SF           100.6580300 MHz
WDW          EM
SSB          0
LB           1.00 Hz
GB           0
PC           1.40
    
```

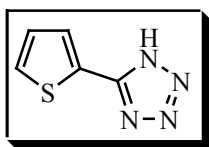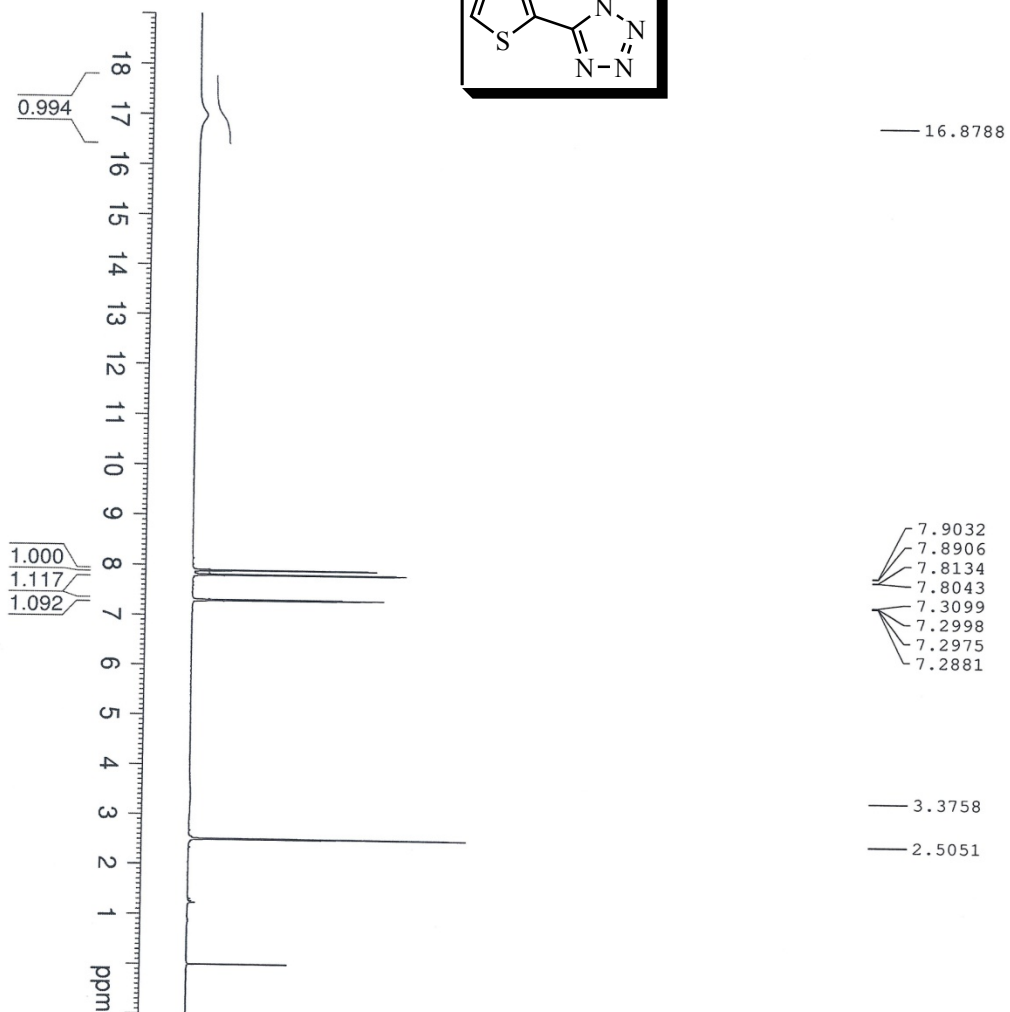

```

===== CHANNEL f1 =====
NAME          VBMR-1-A326868
EXPNO         1
PROCNO        1
Date_         20120130
Time          12.48
INSTRUM       spect
PROBHD        5 mm PABBO BB-
PULPROG       zg30
TD            32768
SOLVENT       DMSO
NS            16
DS            2
SWH           10000.000 Hz
FIDRES        0.305176 Hz
AQ            1.6384500 sec
RG            287
DM            50.000 usec
DE            6.50 usec
TE            293.0 K
D1            2.00000000 sec
TD0           1

===== CHANNEL f1 =====
NUC1          1H
P1            13.93 usec
PL1           -1.00 dB
PL1W          11.92178631 W
SFO1          400.3136028 MHz
SI            32768
SF            400.3100000 MHz
WDW           EM
SSB           0
LB            0.30 Hz
GB            0
PC            1.00
    
```

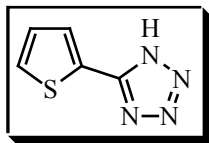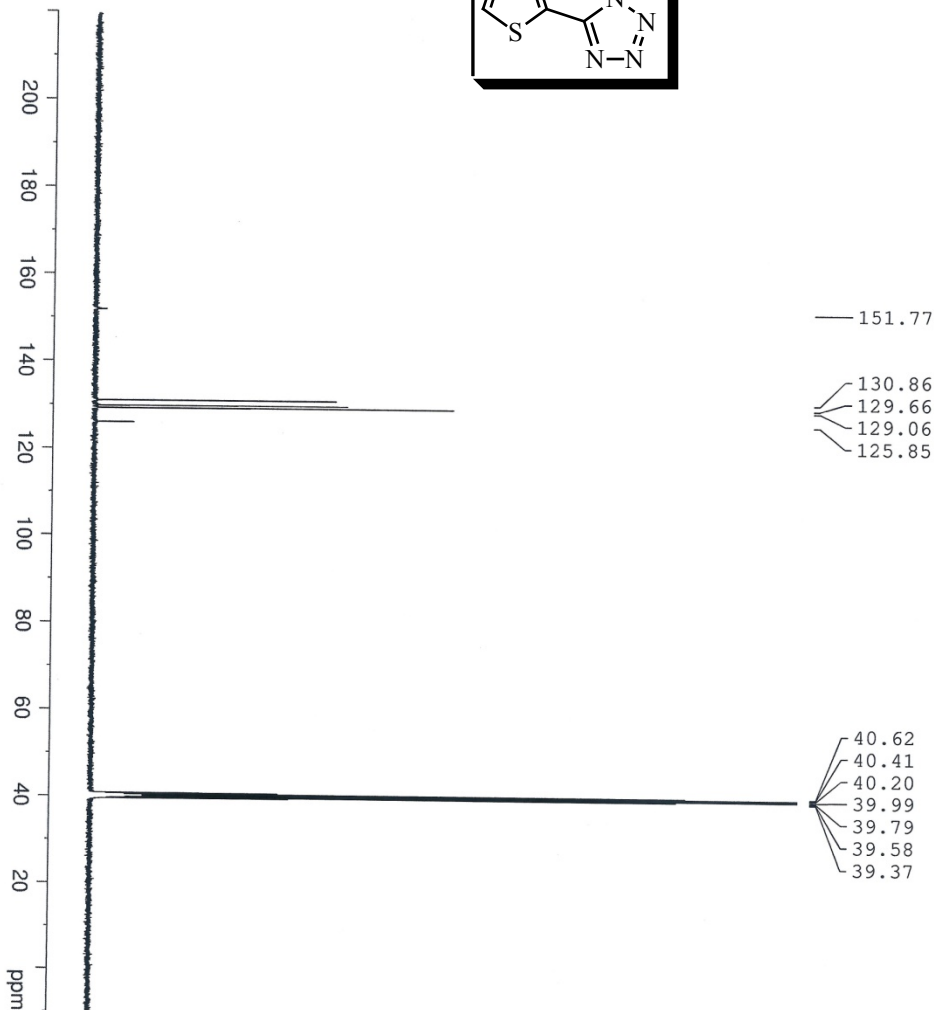

```

NAME          VBMR-1-A326868
EXPNO         2
PROCNO       1
Date_        20120131
Time         0.17
INSTRUM      5 mm PABBO BB-
PROBHD       zgpg30
PULPROG      32768
TD           2048
SOLVENT      DMSO
NS           4
DS           4
SMH          24038.461 Hz
FIDRES       0.733596 Hz
AQ           0.6816244 sec
RG           2050
DW           20.800 usec
DE           6.50 usec
TE           293.0 K
D1           2.00000000 sec
D11          0.03000000 sec
TD0          1

===== CHANNEL f1 =====
NUC1         13C
P1           7.75 usec
PL1         -2.00 dB
PL1W        57.32743073 W
SFO1        100.6680954 MHz

===== CHANNEL f2 =====
CPDPRG2     waitz16
NUC2         1H
PCPD2       80.00 usec
PL2         -1.00 dB
PL12        14.18 dB
PL13        15.00 dB
PL2W        11.92178631 W
PL12W       0.36169401 W
PL13W       0.29946175 W
SFO2        400.3116012 MHz
SI          32768
SF          100.6580300 MHz
WDW         EM
SSB         0
LB          1.00 Hz
GB          0
PC          1.40
    
```
